1 Short title: Two isoforms of AtSCS

2

3 Correspondence to: Maria Bucholc and Grażyna Dobrowolska

4 Institute of Biochemistry and Biophysics, Polish Academy of Sciences,

5 Pawińskiego 5a, 02-106 Warsaw, Poland

6 Tel: 48-22-5925715

7 Fax: 48-22-6584636

8 e-mail: [mjb@ibb.waw.pl](mailto:mjb@ibb.waw.pl); [dobrowol@ibb.waw.pl](mailto:dobrowol@ibb.waw.pl)

9

10 **Article title:** Biochemical, Biophysical, and Functional Analyses of Two Isoforms of  
11 the SnRK2 inhibitor AtSCS

12

13 **Authors:** Krzysztof Tarnowski<sup>1#</sup>, Maria Klimecka<sup>1#</sup>, Arkadiusz Ciesielski<sup>1,2</sup>, Grażyna  
14 Goch<sup>1</sup>, Anna Kulik<sup>1</sup>, Halina Fedak<sup>1</sup>, Jarosław Poznański<sup>1</sup>, Małgorzata Lichocka<sup>1</sup>,  
15 Marcin Pierechod<sup>3¶</sup>, Richard A. Engh<sup>3</sup>, Michał Dadlez<sup>1,4</sup>, Grażyna Dobrowolska<sup>1\*</sup>,  
16 Maria Bucholc<sup>1\*</sup>

17

18 **Affiliations:**

19 <sup>1</sup> Institute of Biochemistry and Biophysics, Polish Academy of Sciences, Pawińskiego  
20 5a, 02-106 Warsaw, Poland

21 <sup>2</sup> Warsaw University, Department of Chemistry, Pasteura 1, 02-093 Warsaw, Poland

22 <sup>3</sup> The Norwegian Center for Structure Biology, Institute of Chemistry, University of  
23 Tromsø, N-9037 Tromsø, Norway

24 <sup>4</sup> University of Warsaw, Institute of Genetics and Biotechnology, Pawińskiego 5a, 02-  
25 106 Warsaw, Poland

26

27 **One sentence Summary:** Two isoforms of SnRK2-interacting calcium sensor are  
28 expressed in Arabidopsis; they differ in calcium binding properties, but both of them  
29 inhibit SnRK2s and subsequently fine tune ABA signaling.

30

31 **Footnotes**

32 M.B., G.D., M.D., and R.A.E. supervised the experiments; K.T., M.K., M.B., A.C.,  
33 G.G., H.F., J.P., M.L., A.K., M.P. performed the experiments; M.B., G.D., M.K., K.T.,  
34 G.G., J.P. designed the experiments and analyzed the data; G.D., M.B., M.K., R.A.E.

35 conceived the project and wrote the article with contributions of all the authors. G.D.  
36 supervised and complemented the writing.

37

38 # These authors contribute equally to the work.

39 ¶ present address: Norwegian Ice Service, Norwegian Meteorological Institute,  
40 Kirkegårdsveien 60, NO-9023 Tromsø, Norway

41

42

43 This work was supported by the Norwegian Research Council and the Research  
44 Program of the EEA/Norway Grants (grant PoINor/203156/70/2013 to GD and RAE),  
45 National Science Centre (grants: 2011/01/B/NZ3/02899 to MB, 2016/23/B/NZ3/03182  
46 to GD, 2014/13/D/NZ3/03101 to AK, MAESTRO 2014/14/A/NZ1/00306 to MD, and  
47 Centre of Preclinical Research and Technology (POIG.02.02.00–14–024/08-00),  
48 National Multidisciplinary Laboratory of Functional Nanomaterials (POIGT.02.02.00-  
49 00-025/09-00).

50

51 \* Corresponding authors: Maria Bucholc and Grażyna Dobrowolska  
52 e-mail: [mjb@gmail.com](mailto:mjb@gmail.com); [dobrowol@ibb.waw.pl](mailto:dobrowol@ibb.waw.pl)

53

54

55

56 **ABSTRACT**

57 SNF1-related protein kinases 2 (SnRK2s) are key signaling elements that regulate  
58 abscisic acid (ABA)-dependent plant development and responses to environmental  
59 stresses. Our previous data showed that the SnRK2-interacting Calcium Sensor  
60 (SCS) is an inhibitor of SnRK2 activity. In *Arabidopsis thaliana*, the use of alternative  
61 transcription start sites located within *AtSCS* gene results in two in-frame transcripts  
62 and subsequently two proteins, which differ only by the sequence position of the N-  
63 terminus. We described the longer *AtSCS-A* earlier, and now we describe the shorter  
64 *AtSCS-B* and compare both isoforms. The two forms differ significantly in their  
65 expression profiles in plant organs and in response to environmental stresses, in  
66 calcium binding properties, and conformational dynamics in the presence and  
67 absence of  $\text{Ca}^{2+}$ . The results show that only *AtSCS-A* has the features of a calcium  
68 sensor. Both forms inhibit SnRK2 activity, but differ with respect to calcium  
69 dependence, as *AtSCS-A* requires calcium for inhibition, while *AtSCS-B* does not.  
70 Analysis of *Arabidopsis* plants stably expressing *35S::AtSCS-A-c-myc* or  
71 *35S::AtSCS-B-c-myc* in the *scs-1* knockout mutant revealed that *in planta* both forms  
72 are negative regulators of the SnRK2 activity induced in response to ABA and  
73 regulate plant defense against water deficit. Moreover, the data present biochemical,  
74 biophysical, and functional properties of EF-hand-like motifs in plant proteins.

75

76 **INTRODUCTION**

77

78 SNF1-related protein kinases 2 (SnRK2s) are plant specific kinases involved in  
79 plant response to environmental stresses (e.g., water deficit, salinity) and in abscisic  
80 acid (ABA)-dependent development (for reviews see: Hubbard et al., 2010; Fujita et  
81 al., 2011; Kulik et al., 2011; Nakashima and Yamaguchi-Shinozaki, 2013; Yoshida et  
82 al., 2015). Based on phylogenetic analyses, SnRK2s have been classified into three  
83 groups. The classification correlates closely with their sensitivity to ABA; group 1  
84 consists of SnRK2s which are not activated by ABA treatment, group 2 includes  
85 kinases which are not or only weakly activated by ABA, and group 3 kinases are  
86 strongly activated by the phytohormone. Ample data demonstrate the role of group 3  
87 SnRK2s in ABA signaling, both in plant development as well as in stress response. In  
88 *Arabidopsis thaliana*, group 3 comprises three members: SnRK2.2, SnRK2.3 and  
89 SnRK2.6. SnRK2.2 and SnRK2.3 are involved mainly in the regulation of seed

90 dormancy and germination (Fujii *et al.*, 2007), whereas SnRK2.6 regulates stomatal  
91 closure in response to water deficit, pathogen infection, CO<sub>2</sub>, ozone, and darkness  
92 (Mustilli *et al.*, 2002; Yoshida *et al.*, 2002; Melotto *et al.*, 2006; Merilo *et al.*, 2013).  
93 However, there is significant functional redundancy between the three kinases. The  
94 *Arabidopsis* triple knockout mutant *snrk2.2/snrk2.3/snrk2.6* is extremely insensitive to  
95 ABA (much more than the single or double knockout mutants), exhibits severely  
96 impaired seed development and dormancy, and is oversensitive to water scarcity due  
97 to disruption of stomatal closure and down-regulation of ABA- and water stress-  
98 induced genes (Fujii and Zhu, 2009; Fujita *et al.*, 2009; Nakashima *et al.*, 2009).  
99 SnRK2s, which are either not or only weakly activated in response to ABA, are also  
100 involved in regulation of plant responses to abiotic stresses (Umezawa *et al.*, 2004;  
101 Mizoguchi *et al.*, 2010; Fujii *et al.*, 2011; McLoughlin *et al.*, 2012; Kulik *et al.*, 2012;  
102 Soma *et al.*, 2017).

103 The SnRK2 kinases are activated transiently in plant cells in response to  
104 environmental signals, and otherwise are maintained in inactive states. The best-  
105 known negative regulators of SnRK2s are protein phosphatases (Umezawa *et al.*,  
106 2009; Vlad *et al.*, 2009; Hou *et al.*, 2016; Krzywińska *et al.*, 2016). Clade A  
107 phosphoprotein phosphatases 2C (PP2Cs) have been identified as major regulators  
108 of ABA-activated SnRK2s (Umezawa *et al.*, 2009; Vlad *et al.*, 2009; and reviews:  
109 Hubbard *et al.*, 2010; Fujita *et al.*, 2011; Nakashima and Yamaguchi-Shinozaki,  
110 2013; Yoshida *et al.*, 2015). Functional and structural studies showed that PP2Cs  
111 hold SnRK2s in an inactive state via a two-step inhibition mechanism (Soon *et al.*,  
112 2012; Zhou *et al.*, 2012; Ng *et al.*, 2014): specific Ser/Thr residues in the kinase  
113 activation loop are dephosphorylated, and a physical interaction between the kinase  
114 activation loop and the phosphatase active site persists to additionally block the  
115 kinase activity. Those results suggested that activity modulation is controlled not only  
116 by the phosphorylation state of SnRK2s but also by specific protein-protein  
117 interactions.

118 A few years ago, we identified and partially characterized another inhibitor of  
119 SnRK2 kinases and consequently of ABA signaling, SnRK2-interacting Calcium  
120 Sensor (SCS) (Bucholc *et al.*, 2011). SCS provides the link between SnRK2s and  
121 calcium signaling pathways.

122 Calcium ions are ubiquitous second messengers that play pivotal roles in plant  
123 response to a number of external signals, inducing and regulating plant development,

124 and responding to biotic and abiotic stresses. Several hundreds of plant proteins that  
125 potentially bind calcium have been identified; it was estimated that the *Arabidopsis*  
126 genome encodes about 250 EF-hand- or putative EF-hand-containing proteins (Day  
127 et al., 2002; Reddy and Reddy, 2004). *Arabidopsis*, presumably along with other  
128 plants, contain many more proteins with canonical and non-canonical EF-hand ("EF-  
129 hand-like") motifs than other organisms. In plants, non-canonical EF-hand motifs are  
130 especially abundant (Day et al., 2002). Only a small fraction of them has been  
131 characterized. Numerous proteins with putative EF-hand-like motifs are involved in  
132 signal transduction; most probably they evolved to sense different calcium levels.  
133 Many of them contain four EF-hand sequences, with variable degrees of  
134 conservation of canonical EF-hand calcium binding motifs. This group comprises  
135 both sensor responder proteins (activated directly upon calcium binding and  
136 transmitting the signal further), as well as sensor relay proteins, which do not have  
137 enzymatic activity; upon  $\text{Ca}^{2+}$  binding, they undergo conformational changes and  
138 trigger activation or deactivation of their cellular partners. The best examples of  
139 sensor responder proteins are calcium dependent protein kinases (CDPKs), usually  
140 with four calmodulin-like EF-hand motifs and a Ser/Thr protein kinase domain that is  
141 activated upon calcium binding (review: Schulz et al., 2013). Sensor relay proteins  
142 involved in plant signaling constitute two main families: calmodulins (CaMs) and  
143 calcineurin B-like (CBL) proteins. Like CDPKs, each of them has four EF-hand or EF-  
144 hand-like motifs. Some CBLs harbor one or two canonical EF-hand motifs; most,  
145 however, have only EF-hand-like motifs (Batistič and Kudla, 2009; Sanchez-Barrena  
146 et al., 2013). The variety in calcium binding motif sequences determines the diversity  
147 in sensor proteins needed for sensing various calcium signatures, and finally to  
148 achieve the response specificity. However, for most CBLs and other predicted  
149 calcium binding proteins the actual calcium binding properties have not been  
150 characterized.

151 SCSs share several similar features with CBL proteins. According to the Prosite  
152 prediction of properties based on sequence, the *Arabidopsis thaliana* SCS protein  
153 (At4g38810) described by us earlier (Bucholc et al., 2011) contains four peptide  
154 sequences resembling EF-hand motifs, of which only one possesses all residues that  
155 define a canonical EF-hand. The other three are quite distinctly non-canonical and  
156 may be considered EF-hand-like. Also like CBLs, SCS is sensor relay protein  
157 involved in signal transduction in plants via interactions with SNF1-related protein

158 kinases (SnRKs), unique to the plant kingdom. While SCSs interact with SnRK2s,  
159 CBLs interact with the SnRK3 kinases, also known as CBL-interacting protein  
160 kinases (CIPKs) or protein kinases related to SOS2 (PKSs). Both CBLs and SCSs  
161 regulate kinase activity, but in opposite ways, as CBLs activate CIPKs (for review see  
162 Batistič and Kudla, 2009; Luan, 2009; Batistič and Kudla, 2012) whereas SCSs  
163 inhibit SnRK2s.

164 Information provided by The Arabidopsis Information Resource (TAIR) indicates  
165 that in Arabidopsis two forms of AtSCS may exist, a longer one with 375 aa (denoted  
166 here as AtSCS-A, as described previously (Bucholc et al., 2011), and its shorter  
167 version with 265 aa (AtSCS-B) corresponding to the 111-375 aa fragment of AtSCS-  
168 A, in which the classical EF-hand motif is missing (Fig. 1A and 1B). *In silico* analysis  
169 of the *AtSCS* gene (At4g38810) sequence indicates that expression of both forms is  
170 possible due to the alternative transcription start sites (TSS); one promoter region is  
171 located upstream of ATG codon of *AtSCS-A*, and the second one responsible for  
172 *AtSCS-B* transcription within first *AtSCS-A* intron (Fig 1A). Alternative mRNA  
173 transcription starting, like alternative mRNA processing, is a well known regulatory  
174 process in eukaryotic organisms, including plants, which expands the genome's  
175 coding capacity and generates protein variation (Tanaka et al., 2009; de Klerk and 't  
176 Hoen, 2015). The result of alternative TSS are usually isoforms of proteins, which  
177 differ in their function, stability, localization and/or expression levels.

178 In the present studies we confirmed the expression of both forms of AtSCS in  
179 Arabidopsis and showed significant differences in their expression profiles in plant  
180 organs and in response to abiotic stress. We compared both proteins with respect to  
181  $Ca^{2+}$ -binding properties, conformational dynamics with and without  $Ca^{2+}$ , and  
182 regulation of the kinase activity *in vitro* and *in vivo*. Analysis of transgenic plants  
183 expressing *35S::AtSCS-A-c-myc* or *35S::AtSCS-B-c-myc* in the *scs-1* knockout  
184 background showed that both forms inhibit the ABA-responsive SnRK2s and, as a  
185 consequence, ABA signaling. The results show that both isoforms play a role in the  
186 regulation of the plant response to dehydration, analogous to that of the A-clade  
187 PP2Cs. Moreover, our results provide novel biochemical and biophysical data on EF-  
188 hand-like motifs in plant proteins.

189

190

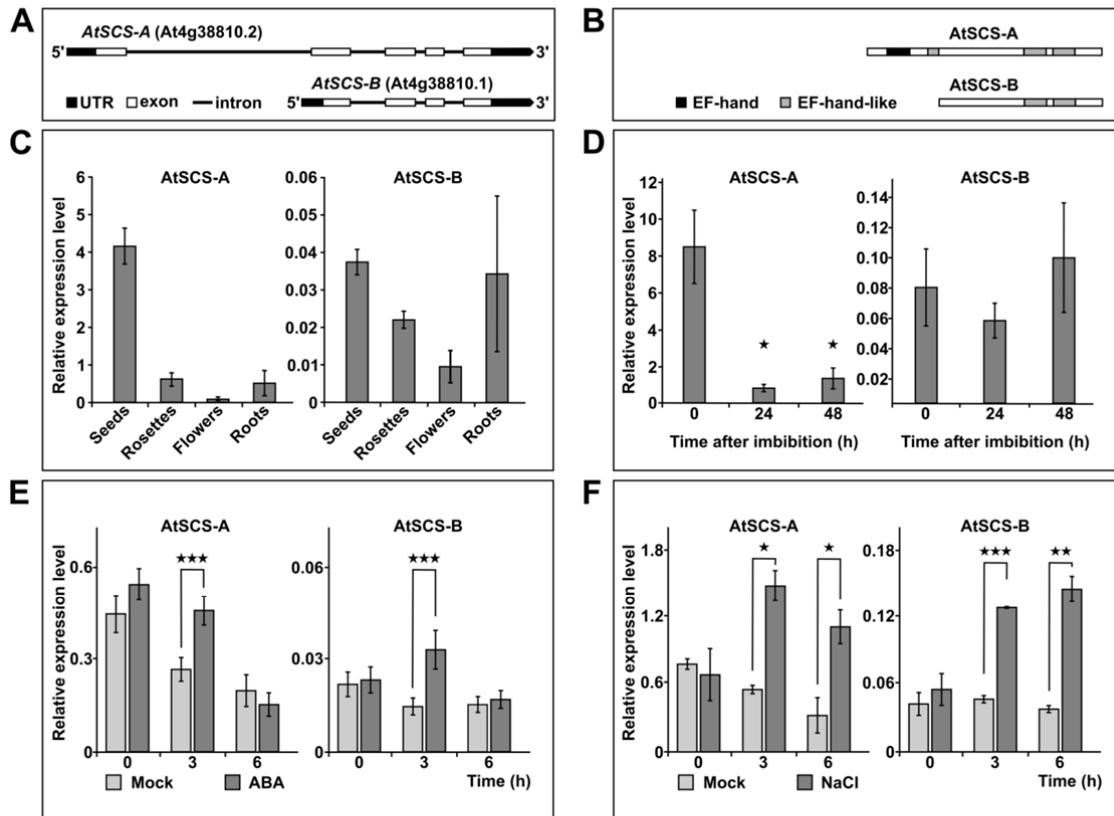

**Figure 1.**

*The expression of AtSCS-A and AtSCS-B varies across plant organs and in plant response to ABA or NaCl treatment. Alternative isoforms of AtSCS (At4g38810), AtSCS-A and AtSCS-B, predicted at transcript (A) and protein (B) levels. The prediction was done based on TAIR plant promoter database (PlantPromoterDB) and Prosite (prediction of EF-hand motifs).*

*Quantitative RT-PCR analysis of AtSCS-A and AtSCS-B transcript levels in different organs (C), in seeds during germination (D), in 2-week-old seedlings exposed to 10  $\mu$ M ABA (E) or 150 mM NaCl (F). In E and F - expression levels in plants exposed to ABA or NaCl (dark grey), whereas in control plants, mock treatment (light grey). Data represent means of triplicate biological repeats, and the error bars indicate SD. For statistical analysis a two-tailed t-test in Microsoft Office Excel was applied. The asterisks indicate significant difference from the wild type (\*P < 0.05; \*\*P < 0.01, \*\*\*P < 0.001).*

## 191 RESULTS

192

### 193 AtSCS-A and AtSCS-B are Differently Expressed in Plant Tissues and in 194 Arabidopsis Seedlings Subjected to ABA or Salt Stress

195

196 To verify that two forms of AtSCS are expressed in Arabidopsis, we analyzed  
197 mRNA level of *AtSCS-A* and *AtSCS-B* in various plant organs (seeds, rosettes,  
198 flowers, and roots). Moreover, since the functional analysis of AtSCS done previously  
199 by a reverse genetic approach indicated that AtSCS is involved in ABA signaling  
200 (Bucholc et al., 2011), we monitored *AtSCS-A* and *AtSCS-B* expression in seedlings



201 exposed to ABA (10  $\mu$ M) or salt stress (150 mM NaCl). To eliminate the potential  
202 influence of the circadian clock on the transcript levels, at each time point the  
203 transcript level of *AtSCS-A* and *AtSCS-B* was also monitored in plants not exposed to  
204 the stressor or ABA. The highest level of *AtSCS-A* transcript was observed in dry  
205 seeds, and the lowest in flowers (Fig. 1C and Supplemental Fig. S1). *AtSCS-B*  
206 expression was the highest in seeds and in roots, however, as it is shown in Fig. 1C  
207 and Fig. S1 *AtSCS-B* was expressed at a much lower level than *AtSCS-A* in all  
208 organs studied; in dry seeds expression of *AtSCS-A* was about 100 times higher than  
209 that of *AtSCS-B*. During seed imbibition the transcript level of *AtSCS-A* rapidly  
210 declined; after 24 h of imbibition the expression was about 10 times lower than that in  
211 dry seeds; in contrast, the transcript level of *AtSCS-B* did not change significantly  
212 during imbibition (Fig. 1D).

213 Analysis of *AtSCS-A* and *AtSCS-B* expression in seedlings exposed to 10  $\mu$ M  
214 ABA showed transient increases (1.7- and 2.3-fold, respectively, at 3 hours) over  
215 levels in seedlings not exposed to ABA, with the differences disappearing by 6 hours  
216 after treatment (Fig. 1E). Salinity stress (150 mM NaCl) increased expression levels  
217 persistently (observed at both 3 and 6 h after treatment), to levels about 3 to 4-fold  
218 higher for both isoforms (Fig. 1F). It should be noted that only *AtSCS-A* expression  
219 undergoes changes during diurnal rhythm.

220

### 221 ***AtSCS-B* Interacts with Members of Group 2 and 3 of the SnRK2 Family**

222

223 To determine whether *AtSCS-B*, like *AtSCS-A*, interacts with SnRK2s, we  
224 used a yeast two-hybrid approach. cDNA encoding *AtSCS-B* was fused in-frame to  
225 cDNA encoding the Gal4 activation domain in pGAD424 yeast expression vector, and  
226 cDNA encoding each of SnRK2s studied was fused to the Gal4 DNA-binding domain  
227 in pGBT9 vector. Using parallel constructions, we also studied interactions between  
228 *AtSCS-A* and SnRK2s. Those can be considered to be positive controls, since  
229 interactions between SnRK2s and *AtSCS-A* have been established previously  
230 (Bucholc et al., 2011). The results revealed that *AtSCS-B* interacts with SnRK2s from  
231 group 3 (SnRK2.2, SnRK2.3, and SnRK2.6) and from group 2 (SnRK2.7 and  
232 SnRK2.8), but does not interact with ABA-non-activated SnRK2 kinases from group 1  
233 (SnRK2.1, SnRK2.4, SnRK2.5 and SnRK2.10) or with SnRK2.9 (Fig. 2A). The results  
234 suggest that *AtSCS-B* is a cellular regulator of members of groups 2 and 3 but not



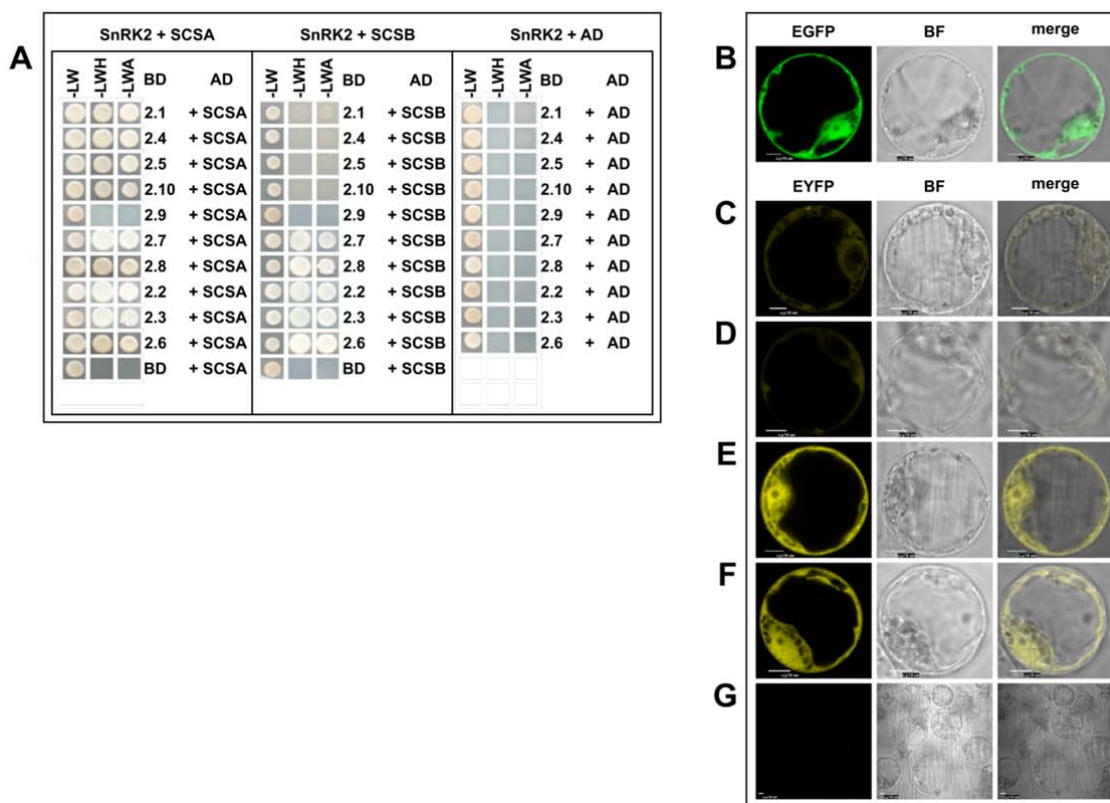

**Figure 2.**

*AtSCS-B* interacts preferentially with kinases that belong to group 2 and 3 of the SnRK2 family. Interactions between Arabidopsis SnRK2s and *AtSCS-B*, or *AtSCS-A* as a control, were analyzed by a yeast two-hybrid assay (A), as described in Bucholc et al., 2011. Yeast transformed with a construct with cDNA encoding one of the analyzed SnRK2s and complementary empty vector (BD-SnRK2+AD), or a construct with *AtSCS-B* or *AtSCS-A* and the other empty vector (BD+AD-*AtSCS*) were used as controls. The growth of yeast expressing the indicated constructs was monitored on selective media: without Leu and Trp (-LW); without Leu, Trp and His and with 8mM AT (-LWH); without Leu, Trp and Ade (-LWA). AD, Gal4 activation domain; BD, Gal4 binding domain.

The subcellular localization of *AtSCS-B* was analyzed in Arabidopsis protoplasts (B), as described in Bucholc et al., 2011. Protoplasts isolated from the T87 Arabidopsis cell line were transiently transformed with plasmid encoding *AtSCS-B-EGFP* and its localization was analyzed by confocal microscopy.

Interaction between *AtSCS-B* and SnRK2s in planta was analyzed by BiFC assay. T87 protoplasts were transiently co-transformed with pairs of plasmids encoding: *AtSCS-B-cEYFP* and nEYFP-SnRK2.4 (C), *AtSCS-B-cEYFP* and nEYFP-SnRK2.10 (D), *AtSCS-B-cEYFP* and nEYFP-SnRK2.6 (E), *AtSCS-B-cEYFP* and nEYFP-SnRK2.8 (F). The binding led to reconstitution of functional YFP from chimeric proteins bearing non-fluorescent halves of YFP. For negative control, *AtSCS-B-cEYFP* was co-expressed with *AtSCS-B-nEYFP* (G). Scale bar = 10  $\mu$ m; BF, bright field. The data shown here represent one of three independent experiments, all with similar results.

235 group 1 of the SnRK2 family. In contrast, *AtSCS-A* does not discriminate between  
 236 these kinases in respect to the interaction. The only Arabidopsis SnRK2 that does not  
 237 bind to either form of *AtSCS* is SnRK2.9.

238 The interactions between *AtSCS-B* and the selected SnRK2s were verified by  
 239 bimolecular fluorescence complementation (BiFC) assays. The proteins were

240 expressed in Arabidopsis protoplasts as described in Bucholc et al. (2011). First, we  
241 analyzed the subcellular localization of AtSCS-B. The protein was produced as a  
242 fusion with EGFP using the pSAT6-EGFP-N1 or pSAT6-EGFP-C1 vector. As with  
243 AtSCS-A (Bucholc et al., 2011), AtSCS-B localized to the nucleus and cytoplasm  
244 (Fig. 2B). In a BiFC assay we analyzed interactions between AtSCS-B and SnRK2.4,  
245 SnRK2.10, SnRK2.6, and SnRK2.8 (Fig. 2C-2F). The kinases and AtSCS-B were  
246 each fused to complementary non-fluorescent fragments of YFP and transiently  
247 produced in Arabidopsis protoplasts. The BiFC assays showed that SnRK2.6 (from  
248 group 3) and SnRK2.8 (from group 2) interact with the AtSCS-B *in planta*. The  
249 interactions occur both in the cytoplasm and nucleus. SnRK2.4 and SnRK2.10 (from  
250 group 1) did not interact with AtSCS-B (in agreement with two-hybrid assay) or they  
251 interact very weakly, as the YFP signal is much weaker for these two kinases than  
252 that observed for SnRK2.6 or SnRK2.8. This supports the view that AtSCS-B is  
253 rather not a cellular regulator of ABA-non-activated SnRK2 kinases. A very low  
254 fluorescence signal detectable in the negative control samples was much weaker  
255 than YFP signal in BiFC samples (Fig. 2G). A comparison with AtSCS-A should be  
256 noted; as published previously, AtSCS-A interacts with all SnRK2 kinases studied,  
257 but exclusively in the cytoplasm (Bucholc et al., 2011).

258

### 259 **AtSCS-B Inhibits SnRK2 Activity in Calcium-Independent Manner**

260

261 Our previous results showed that AtSCS-A inhibits SnRK2 activity only in the  
262 presence of calcium ions (Bucholc et al., 2011). To check whether AtSCS-B inhibition  
263 of SnRK2 activity is similarly calcium dependent we monitored the *in vitro* activity of  
264 SnRK2.6 and SnRK2.8 in the presence of increasing amounts of purified  
265 recombinant AtSCS-B, with and without calcium ions in the reaction mixture. The  
266 kinase activity was analyzed using MBP as a substrate. The results showed that  
267 AtSCS-B, in contrast to AtSCS-A, inhibits the SnRK2 activity both in the presence  
268 and in the absence of calcium ions (in the presence of EGTA) (Fig. 3A and 3B).

269

### 270 **Both AtSCS-A and AtSCS-B Inhibit the SnRK2 Activity *in planta***

271

272 To investigate the involvement of AtSCS-A and AtSCS-B in the regulation of  
273 SnRK2 activity *in vivo* we obtained homozygous transgenic Col-0 Arabidopsis plants

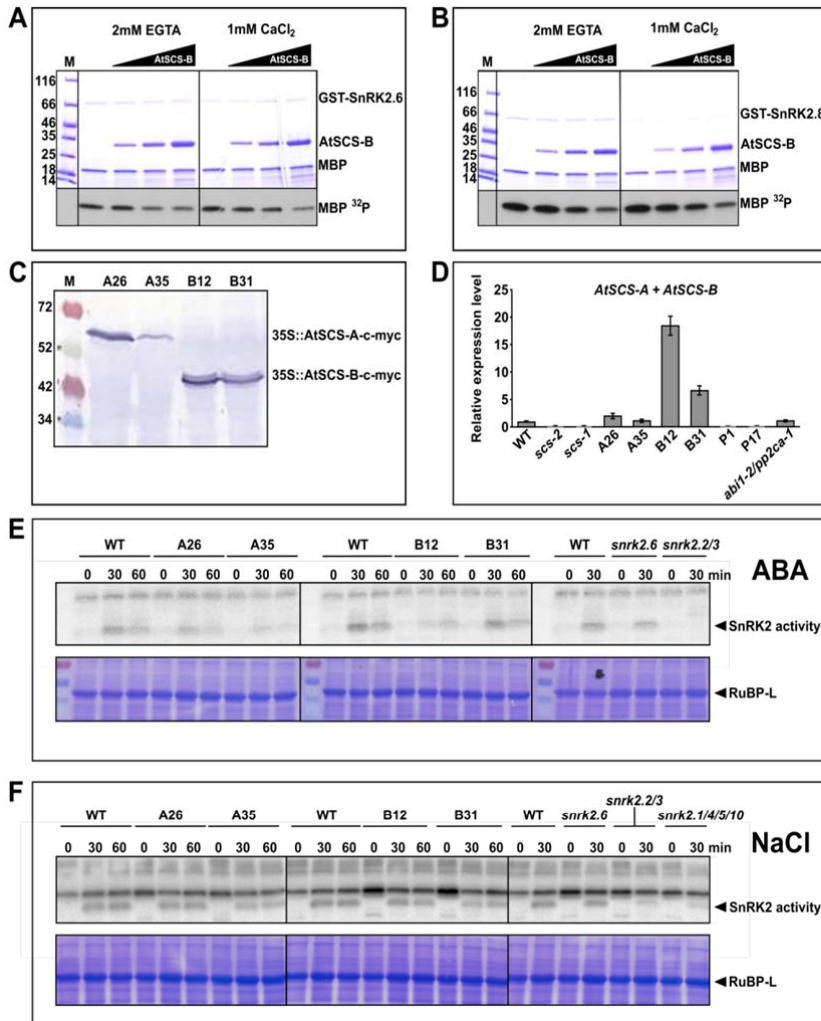

**Figure 3.**

*AtSCS-A* and *AtSCS-B* inhibit the *SnRK2* activity *in vitro* and *in vivo*. *AtSCS-B* inhibition of *SnRK2.6* (A) and *SnRK2.8* (B) is calcium independent. *SnRK2.6*, *SnRK2.8*, and *AtSCS-B* were expressed in *E. coli* and the kinase activity was measured in the presence of increasing amounts of *AtSCS-B* (0, 40, 80 and 160 ng per  $\mu$ L) without or with  $Ca^{2+}$  (2 mM EGTA or 1 mM  $CaCl_2$ , respectively) in the reaction mixture. The kinase activity was monitored using MBP and [ $\gamma$ -<sup>32</sup>P]ATP as substrates. Reaction products were separated by SDS-PAGE and MBP phosphorylation was determined by autoradiography. The data represent one of three independent experiments showing similar results. The expression of *AtSCS-A* and *AtSCS-B* in seedlings of homozygous transgenic lines 35S::*AtSCS-A-c-myc* (A26 and A35) and 35S::*AtSCS-B-c-myc* (B12 and B31) was measured at protein (C) and transcript (D) levels. The production of *AtSCS-A-c-myc* and *AtSCS-B-c-myc* proteins was monitored in seedlings of the transgenic plants by Western blotting using anti-c-myc antibodies. *AtSCS* mRNA level was monitored in the transgenic plants expressing *AtSCS-A-c-myc* or *AtSCS-B-c-myc*, or *c-myc* (vector control: P1, P17), the *scs-1* and *scs-2* mutants, as well in the WT plants by quantitative RT-PCR analysis. Data represent means of triplicate biological repeats, and the error bars indicate SD. Analysis of the *SnRK2* activity in 2-week-old seedlings of the WT, transgenic plants expressing *AtSCS-A-c-myc* or *AtSCS-B-c-myc*, and selected *snrk2* knockout mutants subjected to 100  $\mu$ M ABA (E) or 350 mM NaCl (F) shows significant *in planta* inhibition by *AtSCS* isoforms. The kinase activity was monitored by in-gel-kinase activity assay using as substrate GST-ABF2 (G73-Q120) or MBP, respectively. The representative results from one of three independent experiments are shown.

274 expressing *AtSCS-A-c-myc* (5 independent lines) or *AtSCS-B-c-myc* (3 independent

275 lines) under control of the 35S promoter, as well as plants expressing an empty  
276 vector, in an *scs-1* knockout background deficient in both AtSCS forms. For the  
277 studies we selected two transgenic lines 35S::AtSCS-A-c-myc (A26 and A35),  
278 35S::AtSCS-B-c-myc (B12 and B31), with the highest expression of the transgene  
279 (Fig. 3C, 3D, and Supplemental Fig. S2). We analyzed the kinase activity  
280 phosphorylating ABF2 (Gly73-Gln120) peptide (in the case of plants exposed to ABA)  
281 or myelin basic protein (MBP, in the case of plants exposed to NaCl) in 2-week-old  
282 seedlings of A26, A35, B12, and B31 lines, and the wild type Arabidopsis (WT). The  
283 activity was analyzed before and after treatment with 100  $\mu$ M ABA (or 350 mM NaCl)  
284 by in-gel kinase activity assay according to Wang and Zhu (2016). The SnRK2  
285 activity induced in response to ABA was significantly lower in both 35S::AtSCS-A-c-  
286 myc lines (A26 and A35) and in one of 35S::AtSCS-B-c-myc lines (B12) compared to  
287 WT plants (Fig. 3E). In the B31 line, with its lower expression of AtSCS-B-c-myc  
288 compared to B12 line, the ABA-induced SnRK2 activity was similar to that observed  
289 in the WT plants. These results indicate that both AtSCS-A and AtSCS-B inhibit the  
290 kinase activity induced by ABA treatment; however, the inhibition is stronger in the  
291 presence of AtSCS-A. The analysis of the kinase activity in the same Arabidopsis  
292 lines treated with NaCl showed only very weak, if any, inhibition of the SnRK2 activity  
293 by AtSCSs (Fig 3F). In summary, these results indicate that both forms of AtSCS are  
294 able to inhibit the SnRK2s *in vivo*, especially those kinases which are involved in ABA  
295 signaling.

296

### 297 **AtSCS-A and AtSCS-B Have an Impact on the Plant Sensitivity to Dehydration**

298

299 Our results showed that expression of *AtSCS-A* and *AtSCS-B* is induced in  
300 the response to ABA (Fig.1E). Moreover, the activity of ABA-responsive kinases in  
301 Arabidopsis seedlings overexpressing AtSCS-A or AtSCS-B exposed to exogenous  
302 ABA is significantly reduced in comparison to that observed in the WT plants (Fig.  
303 3E). Since the ABA-responsive SnRK2s are key regulators of the plant response to  
304 dehydration, we studied the impact of AtSCSs on the plant response to water deficit.  
305 We analyzed the survival rate of the Col-0 WT, the *scs* knockout mutants (lines *scs-2*  
306 and vector control P1, 35S:c-myc in *scs-1* background), 35S::AtSCS-A-c-myc (A26  
307 and A35 lines) and 35S::AtSCS-B-c-myc (B12 and B31lines) transgenic plants under  
308 drought conditions (the watering was withdrawn for 14 days) and after re-watering. In



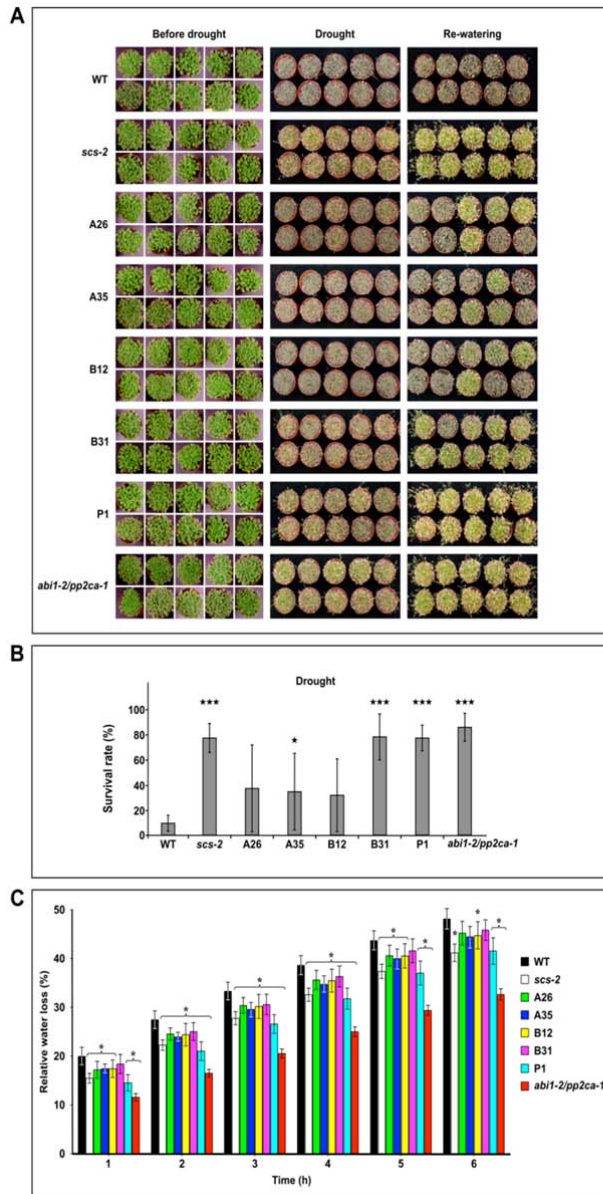

**Figure 4.**

*AtSCS-A* and *AtSCS-B* Regulate the Response of *Arabidopsis* to Water Deficit. The drought survival rate test (A). The *Arabidopsis* plants were grown in pots for 17 days under long day conditions and for an additional 2 weeks without watering. The pictures were taken before watering was stopped (before drought), after two weeks without water (drought), and two days after re-watering (re-watering). Ten pots with approximately 50 plants for each line per experiment were used. Representative plants are presented. The drought survival rate (B) was calculated by analysis of at least 1000 plants per each line. For the statistical analysis a t-test was applied. The asterisks indicate significant differences from the wild type (\* $P < 0.05$ ; \*\* $P < 0.01$ , \*\*\* $P < 0.001$ ). The average values  $\pm$  SE are shown.

Water loss from detached *Arabidopsis* rosettes (C). Rates of water loss from the whole rosettes of six-week-old plants of wild type and different mutant lines were measured at the time points indicated. Finally, the rosettes were dried at 70°C overnight and weighed. The cut rosette water loss (CRWL) was calculated. The representative results from one of four independent experiments are shown. Eight plants were used for each line per experiment. For the statistical analysis, a t-test was applied. The asterisks indicate significant differences from the wild type (\* $P < 0.05$ ; \*\* $P < 0.01$ , \*\*\* $P < 0.001$ ). The average values  $\pm$  SE are shown.

310 phosphates, ABI1 and PP2CA, well known inhibitors of ABA-dependent SnRK2s and  
311 ABA signaling (Umezawa et al., 2009; Vlad et al., 2009; Rubio et al., 2009), as a  
312 control. Our results confirmed previously published data (Rubio et al., 2009) that the  
313 *abi1-2/pp2ca-1* mutant exhibits enhanced resistance to drought stress and showed  
314 that the *scs-2* mutant and P1 line similarly as *abi1-2/pp2ca-1* were more resistant to  
315 dehydration than all other lines studied (Fig. 4A and 4B). The data indicated similar  
316 regulation of the response to dehydration of AtSCSs and the clade A PP2Cs. The  
317 results also showed that expression of *AtSCS-A* (lines A26 and A35) or *AtSCS-B*  
318 (especially line B12 with a higher level of AtSCS-B) alone only partially complement  
319 the phenotype of the *scs* mutant, which suggests that both forms of SCS are needed  
320 for the full complementation.

321 Additionally, we measured water loss in detached rosettes of 6-week-old  
322 plants of all the lines listed above. The water loss was lower in rosettes of the *scs*  
323 mutants (*scs2* and P1, vector control in *scs1* background) than in other lines (Fig.  
324 4C), which is in agreement with the result of drought survival test (Fig. 4A and 4B).

325 Using Arabidopsis lines with differing the AtSCS-A or AtSCS-B levels we also  
326 investigated the involvement of AtSCSs in regulation of the expression of ABA-  
327 induced stress-related genes. For the analysis we chose two genes regulated by  
328 SnRK2s in an ABA-dependent manner, *Rab18* and *RD29B*. We did not observe any  
329 significant differences in the expression of genes studied in response to ABA  
330 between lines studied (Supplemental Fig S3) indicating that SCSs are rather not  
331 involved in the regulation of gene expression. This result is consistent with our data  
332 showing that SCSs interact with SnRK2s mainly in the cytoplasm; AtSCS-A interacts  
333 exclusively in the cytoplasm (Bucholc et al., 2011, Fig.2B), whereas AtSCS-B in the  
334 cytoplasm and in the nucleus. However, we cannot exclude the possibility that  
335 transiently overexpressed AtSCS-B-GFP/YFP is passively diffused to the nucleus  
336 (that is why we observe its presence both in the cytoplasm and the nucleus).

337

### 338 **AtSCS-B Binds Ca<sup>2+</sup> Without a Substantial Effect on the Protein Conformation**

339

340 In order to compare calcium-binding properties of AtSCS-B to that of AtSCS-A  
341 described earlier (Bucholc et al., 2011), we monitored changes in fluorescence of  
342 AtSCS-B and AtSCS-A (as a control) accompanying binding of calcium. The proteins  
343 were excited at 280 nm (monitoring the fluorescence of all fluorophores) or at 295 nm

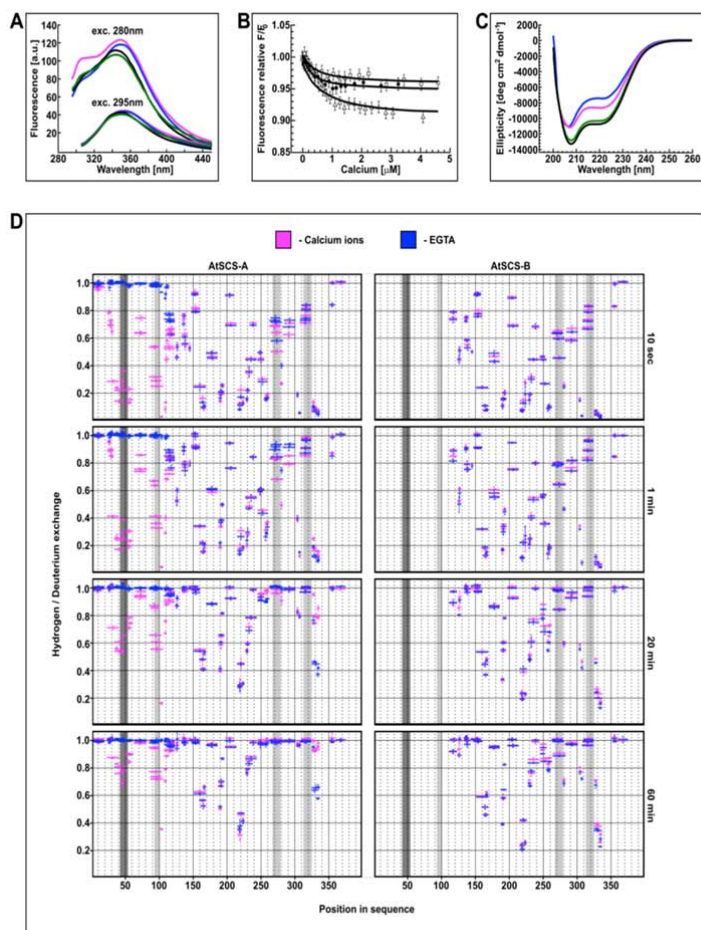

**Figure 5.**

*AtSCS-B Binds Ca<sup>2+</sup> Without a Substantial Effect on the Protein Conformation.* The fluorescence spectra of AtSCS-B and AtSCS-A proteins (A). The fluorescence spectra of 1.2  $\mu$ M solution of AtSCS-A or AtSCS-B protein, excited at 280 nm (upper curves) or at 295 nm (bottom curves). apo AtSCS-A protein (blue line), apo AtSCS-B protein (black line), holo AtSCS-A (magenta line), and holo AtSCS-B (green line) are presented. The fluorescence spectra represent one of three independent measurements.

The fluorescence titration curves of AtSCS-B protein by calcium ions (B). The fluorescence excitation and the emission were at 280 and 342 nm (open triangles) or 280 and 340 nm (black circles, open squares), respectively. The calcium ions titration of 1.5  $\mu$ M solutions of AtSCS-B as well as the experimental errors and the theoretical curves, calculated for a single-site ligand binding model (solid lines), are shown.

Conformational changes of AtSCS-A and AtSCS-B proteins upon Ca<sup>2+</sup> binding. (C) CD spectra of 2  $\mu$ M solutions of AtSCS-B or AtSCS-A with 1 mM Ca<sup>2+</sup> (green and magenta lines, respectively) or without Ca<sup>2+</sup> (100  $\mu$ M EDTA; blue for apo AtSCS-A and black for apo-AtSCS-B).

Changes of conformational dynamics of AtSCS-A and AtSCS-B upon Ca<sup>2+</sup> binding. (D) H/D exchange in AtSCS-A (left panels) and AtSCS-B (right panels) in the presence (magenta) or in the absence of Ca<sup>2+</sup> (EGTA, blue). The proteins were incubated in D<sub>2</sub>O buffer for various times (10 sec, 1 min, 20 min, 60 min) and the extent of H/D exchange was determined by mass spectrometry. The horizontal red and blue bars indicate individual peptides identified by mass spectrometry. The X-axis indicates their position in the amino acid sequence of the AtSCS-A. The Y-axis shows relative deuterium uptake calculated as described in Material and Methods; the value 1 represents maximal deuteriation level, meaning that all hydrogens in amide bonds of particular peptide were exchanged to deuterium. Error bars are standard deviations from at least three independent experiments. Dark grey – position of calcium binding loops of the canonical EF-hand motif, light grey – positions calcium binding loops of potential non-canonical EF-hand motifs.



345 fluorophores: Trp72, Tyr29 and Tyr168 (corresponding to Trp182, Tyr139 and Tyr278  
346 in AtSCS-A). The protein fluorescence spectrum is dominated by the broad  
347 tryptophan fluorescence band, and the tyrosine fluorescence band is apparent as  
348 well. The binding of calcium caused small changes: the small intensity decrease and  
349 very small 'red shift' of the maximum,  $\lambda_{\max}(\text{apo}) = 342.5 \text{ nm} \rightarrow \lambda_{\max}(\text{holo}) = 343$   
350  $\text{nm}$  (for the fluorescence excitation at 280 nm) and  $\lambda_{\max}(\text{apo}) = 350 \text{ nm} \rightarrow \lambda_{\max}$   
351  $(\text{holo}) = 351 \text{ nm}$  (excitation at 295 nm) (Fig. 5A). Also, the small increase of the  
352 intensity was observed for the fluorescence band of the tyrosine residue(s), near 305  
353 nm. The fluorescence spectrum of AtSCS-B suggests that the tryptophan residue is  
354 buried and inaccessible to an energy transfer from the tyrosine residue(s), and  
355 located in an environment that quenches its fluorescence strongly. The calcium  
356 binding entails a subtle rearrangement of Trp72 environment, linked with the small  
357 red shift of Trp72 fluorescence (at 295 nm excitation) (Fig. 5A).

358 In parallel, analogous experiments were performed for AtSCS-A protein, as  
359 was also studied previously (Bucholc et al., 2011). AtSCS-A protein is longer than  
360 AtSCS-B by 110 amino acid residues and richer by one tyrosine residue, Tyr80. The  
361 protein is also more sensitive to calcium ions due to the presence of the canonical  
362 EF-hand motif. The fluorescence spectra of the AtSCS-A, for *apo* form of the protein,  
363 are similar to those of AtSCS-B (Fig. 5A). The most significant fluorescence changes  
364 after calcium binding were observed as an increase in the intensity of the tyrosine  
365 fluorescence band (Fig. 5A). The contribution of tryptophan residue to those changes  
366 is small. The fluorescence spectra excited at 295 nm, are almost the same for the  
367 calcium-free and the calcium-bound protein (Fig. 5A, bottom curves), supporting the  
368 conclusion that the conformation of the protein in the environment residues Trp182 is  
369 only slightly altered by calcium ions. In contrast, the conformation of the protein in the  
370 environment of the one or more of the tyrosine residues changes dramatically. Tyr80  
371 present in the N-terminal fragment of AtSCS-A (absent in AtSCS-B protein) seems  
372 responsible for these changes. Its fluorescence is influenced most probably by the  
373 rearrangement of the canonical EF-hand motif upon calcium binding.

374 The affinity for calcium of AtSCS-B protein was determined from the fluorescence  
375 titration experiments (Fig. 5B). The fluorescence, excited at 280 nm, was measured  
376 at 340 or 342 nm, in the fluorescence maximum. The maximal fluorescence intensity  
377 changes were small; they did not exceed 10% of the initial fluorescence of the protein  
378 (Fig. 5B). To the resulting titration curve, the function describing the binding of

379 calcium ion [eq. (c), from “Experimental Procedures”] was fitted. The function is  
380 analogous with eq. 8 in Eftink (1997) describing single-site ligand binding. The  
381 calcium association constant  $K_1$  was estimated as  $2.4(\pm 1.0) \times 10^3 \text{ M}^{-1}$ , as the average  
382 of three independent measurements. The value of  $K_1 = 2.4 \times 10^3 \text{ M}^{-1}$ , corresponds to a  
383 dissociation constant of 0.4 mM.

384 The stoichiometry of the binding of calcium ions to AtSCS-B was determined from  
385 the fluorescence titration curves (Supplemental Fig. S4). The index  $n$  equal 1 was  
386 estimated based on the Hill equation describing the association of the ligand to the  
387 protein, used for the analysis of fluorescence measurements. The resulting formula,  
388 derived from the classic Hill equation, is as follows:

$$389 \quad n = (\log(x/(1-x)) - \log K_a) / \log L_t$$

$$390 \quad (x/(1-x)) = (F' - 1) / (f_B - F')$$

391 where:  $x$  – mole fraction of the complex protein-ligand,  $F'$  - relative observed  
392 fluorescence (relative to the initial fluorescence without the ligand),  $f_B$  - relative  
393 fluorescence of the complex protein-ligand,  $L_t$  - the total (free and bound)  
394 concentration of ligand, and  $K_a$  is the overall association constant of protein-ligand.  
395 This result indicates that AtSCS-B molecule most probably binds one calcium ion.

396 Structural changes of AtSCS-B upon calcium binding were analyzed by far-UV  
397 circular dichroism spectroscopy (CD). The binding of calcium ions by the AtSCS-B  
398 protein was accompanied by minor structural changes, seen as a decrease of  
399 negative CD signals (Fig. 5C) indicating very mild disruption of the protein structure in  
400 response to calcium binding, limited to some reduction of helix content or some helix  
401 reorientation. In parallel, as a control, the CD spectrum of AtSCS-A protein in the  
402 same conditions was analyzed (Fig. 5C). The values of residual molar ellipticity  
403 agreed well with the earlier data (Bucholc et al., 2011). The  $\text{Ca}^{2+}$ -free AtSCS-A  
404 protein is 28% helical, and the contribution of helical structures in the  $\text{Ca}^{2+}$ -bound  
405 protein is higher, but less than in AtSCS-B protein (both calcium-free and calcium-  
406 bound).

407

## 408 **Differences in Conformational Dynamics Between AtSCS-A and AtSCS-B upon** 409 **Calcium Binding**

410

411 The analysis of AtSCS proteins using fluorescence and CD spectroscopy  
412 methods revealed that the structure of AtSCS-A, but not AtSCS-B, undergoes

413 significant change upon  $\text{Ca}^{2+}$  addition; they do not, however, indicate where the  
414 conformational changes occur. Therefore, in order to investigate the structure and  
415 conformational dynamics of AtSCS proteins in the absence and in presence of  $\text{Ca}^{2+}$   
416 ions, hydrogen deuterium exchange monitored by mass spectrometry (HDX-MS) was  
417 applied. HDX-MS is an analytical technique that maps protein conformational  
418 dynamics in solution to specific regions of the protein. The approach applied in this  
419 study gave structural information with peptide resolution since the measured degree  
420 of exchange is an average over the lengths of the peptides resulting from pepsin  
421 digestion. This is especially informative, as to our knowledge no structure of AtSCS-A  
422 or AtSCS-B (or any similar proteins) has been determined by X-ray crystallography,  
423 Cryo-EM or NMR; none has been deposited in the PDB database.

424 The hydrogen deuterium exchange patterns along the AtSCS-A and AtSCS-B  
425 proteins were obtained for two conditions, one in the presence and in the absence of  
426  $\text{Ca}^{2+}$  (in buffer with EGTA). Regions could be classified variously as stable or labile,  
427 and the stability of some of these regions was calcium dependent, as we describe  
428 next.

429

430 **Conformational dynamics of AtSCS-A** - The HDX-MS data show that  
431 AtSCS-A protein contains several regions of retarded exchange, independent of the  
432 presence of  $\text{Ca}^{2+}$  (Fig. 5D and Supplemental Fig. S5-S7). Peptides spanning 151-  
433 169, 187-196, 215-226 residues can be classified as the most protected (i.e., most  
434 stable) regions. These are thus regions involved in the hydrogen-bonding network  
435 that constitute the structural core of the molecule. There are also regions along the  
436 AtSCS-A sequence for which the level of HD exchange is very high, also  
437 independent of the presence of  $\text{Ca}^{2+}$  ions. Peptides spanning positions 1-19, 110-  
438 123, 133-140, 147-160, 197-214, 233-244, 307-325, 351-375 can be classified as the  
439 most labile regions. Highly dynamic regions in the inner parts of the SCS protein  
440 sequence are probably located within loops and extended turns which connect  
441 adjacent elements of the protein.

442 Some segments of AtSCS-A showed drastically different conformational  
443 dynamics depending on the presence of calcium ions. In the presence of EGTA (and  
444 absence of calcium), an N-terminal segment of AtSCS-A (region approximately from  
445 20 to 110 amino acid) undergoes very fast HD exchange. This region exhibits no  
446 protection even at the lowest measured experimental time of 10 seconds labeling

447 (Fig. 5D, Supplemental Fig. S5-S7), indicating a lack of secondary structure of this  
448 domain. The presence of  $\text{Ca}^{2+}$  ions dramatically changes the pattern of HD exchange  
449 in this region, strongly decreasing the uptake of deuterium in two segments. One of  
450 them spans the calcium-binding loop of classical EF-hand motif (fragment 42-53).  
451 Unexpectedly, significant changes in the deuterium uptake after  $\text{Ca}^{2+}$  addition occur  
452 also in the region of residues 85-112 (Fig. 5D, Supplemental Fig. S5-S7). In that part  
453 of the AtSCS-A, a Prosite motif search algorithm predicted the occurrence of the  
454 putative non-canonical EF-hand motif.

455 Some changes in levels of HD exchange upon  $\text{Ca}^{2+}$  binding also appear in the  
456 AtSCS-A segments 254--301 and 325-337 (Fig. 5D, Supplemental Fig. S6-S7). Two  
457 hypothetical EF-hand-like loops (positions: 267-278 and 313-324) are predicted  
458 within and close to these fragments. Here, several regions characterized by relatively  
459 stable structure were detected. Notably, the retarded exchange is observed in  
460 segments directly flanking the putative calcium binding motifs, indicating the  
461 presence of stable secondary structure elements there (positions: 245-263 and 325-  
462 337). The flanking regions seem to be structured both in the presence and in the  
463 absence of calcium ions, whereas the putative EF-hand-like calcium-binding loops  
464 exhibit quite high HD exchange levels independent of calcium ions (Fig. 5D and  
465 Supplemental Fig. S5 and S6) and can be classified as dynamic regions.  
466 Interestingly, the flexibility of fragment 262-301 is decreased when calcium is present  
467 (Fig. 5D, Supplemental Fig. S5 and S6). The opposite effect, i.e., destabilization in  
468 the presence of calcium, was observed for the region 325-337.

469

470 **The structure of the common region is more stable in AtSCS-B than in**  
471 **AtSCS-A, both in the presence and in the absence of calcium ions** - Patterns of  
472 HD exchange obtained in the same experimental conditions for AtSCS-A and AtSCS-  
473 B indicate that in general both forms do not differ much from each other in the region  
474 110-250, which is common for both forms (Fig. 5D and Supplemental Fig. S5 and  
475 S7). There are however some differences, mainly near putative calcium binding loops  
476 (region 157-168 in AtSCS-B, corresponding to 267-278 in AtSCS-A, and 203-214 in  
477 AtSCS-B, corresponding to 313-324 in AtSCS-A. Strikingly, in the longer variant  
478 (AtSCS-A), regions flanking the predicted calcium-binding loops reveal lower stability  
479 than in the shorter variant, which lacks residues 1-110 (AtSCS-B). Thus, the native  
480 stability of the C-terminal fragment is disturbed in the structural context of the longer

481 variant. This strongly indicates that the N-terminal domain, absent in AtSCS-B, is  
482 structurally coupled to the C-terminal part in AtSCS-A and destabilizes its structure.  
483 On the other hand, the HDX data show that in the presence of calcium the third  
484 predicted EF-hand-like calcium-binding loop (region 267-278) in AtSCS-A is  
485 stabilized in the presence of calcium and becomes similar to that of AtSCS-B. (Fig.5D  
486 and Supplemental Fig. S5 and S6)

487

## 488 **Models of AtSCS-A / AtSCS-B Structure**

489

490 Due to the lack of relevant templates in the PDB, the 3D structure of AtSCS-A  
491 was modeled separately for two regions, defined by residue ranges of 1-175 and  
492 211-330, respectively. For these protein fragments homology modeling was carried  
493 out based on the rationally selected subsets of PDB structures; as described in  
494 Methods section.

495

496 **N-terminal domain of AtSCS-A** - The best models for the fragment covering  
497 residues 1-175 were built using either 4MBE or 1SL8 PDB records as templates.  
498 However, in the hybrid model, obtained by the combination of fragments of 4MBE,  
499 4OR9, 1SL8 and 4N5X, modeled structures were scored even better. Since the N-  
500 terminal fragment 1-26 was strongly divergent in all models, and was also found  
501 flexible in HDX experiments, the subsequent round of modeling was restricted to  
502 residues 26-175. The final hybrid model, based on the combination of structural  
503 motifs adopted from 2ZND, 1Y1X, 5B8I, 2TN4, 4OR9, scored higher than any of the  
504 single structure-based models. The fold of the modeled N-terminal domain shows two  
505 pairs of EF-hand-like motifs, the relative orientation of which visibly varies between  
506 individual models. However, in the majority of them, the <sup>42</sup>DQDEDGKLSVTE<sup>53</sup> loop  
507 (Fig. 6A, magenta tube) adopts the canonical conformation characteristic for the  
508 calcium-loaded form of EF-hand, whereby calcium is coordinated by the side-chain  
509 carboxyl groups of Asp42, Asp44, Asp46 and Glu53, along with the carbonyl oxygen  
510 of Lys48 (magenta in Fig. 6A). It should be however mentioned that, according to the  
511 review on conservation of individual residues located at the Ca<sup>2+</sup> binding loop (Halling  
512 et al., 2016) Gln, Glu, Lys, Leu, Val and Thr are rarely identified at positions 2, 4, 7, 8  
513 and 11 of calmodulin EF-hand motifs (1.0, 1.1, 5.2, 1.8, 2.0 and 3.0 %, respectively).  
514 The sequences of the paired loop (<sup>88</sup>THGSQEKVSKTE<sup>99</sup>, blue in Fig. 6A) preclude

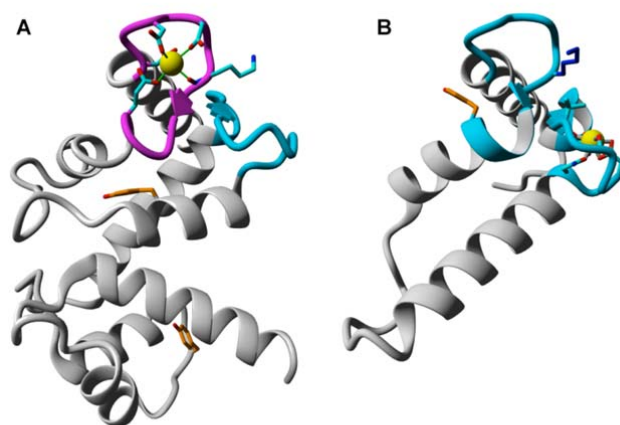

**Figure 6.**

*Modeled by homology structures of N-terminal (residues 26-175) (A) and C-terminal (residues 251-330) (B) parts of AtSCS-A* The ribbon representation follows the protein backbone. In magenta and blue are marked peptides predicted as canonical or non-canonical, respectively, EF-hand calcium binding loops. Residues putatively involved in calcium binding are denoted by sticks, yellow spheres represent calcium ions. Tyrosine residues are labeled by orange color.

515 calcium binding. Interestingly, the side chain of Lys94 located in this loop may  
516 compete with  $\text{Ca}^{2+}$  for the binding site, thus stabilizing an EF-hand fold for the *apo*  
517 form. Both findings suggest that the N-terminal domain of AtSCS-A binds a single  
518  $\text{Ca}^{2+}$  cation with an affinity substantially lower than that of calmodulin, which confirms  
519 our previous data describing  $\text{Ca}^{2+}$ -binding properties of AtSCS-A (Bucholc et al.,  
520 2011).

521 Finally, it should be mentioned that both tyrosine residues (Tyr80 and Tyr139,  
522 orange in Fig. 6A) are buried, and fluorescence of Tyr80 should be affected by  
523 calcium binding, what is in agreement with our results of the analysis of AtSCS-A in  
524 respect of changes in fluorescence upon binding of calcium.

525

526 **C-terminal domain of AtSCS-A / AtSCS-B** - There were no appropriate  
527 templates for the C-terminal fragment (residues 331-378). The best model for the  
528 fragment defined by residues 211-330 was based on 1PRW, and no further  
529 improvement was achieved for the hybrid models. However, detailed inspection of  
530 the alternative highly scored models (e.g., based on 1QTX or 4AQR) clearly shown  
531 that only the fragment covering residues 251N-A330 could be reasonably modeled,  
532 while the homology-modeled structure of 211-250 critically depends on the template  
533 protein used. The subsequently built hybrid model for 251N-A330 was based on  
534 3TZ1, with some parts improved using alternative models based on 1QTX, 1RFJ,



535 3WFN and 1PRW. The resulting structure represents pair of EF-hand-like motifs, one  
536 of which (<sup>313</sup>NGDDGNVVKEEE<sup>324</sup>) may display propensities toward binding of  
537 calcium via side-chain oxygen atoms of N313, D315 and E324, and backbone  
538 carbonyl groups of G317 and V319, the affinity of which must be expected much  
539 lower than that for N-terminal part of the protein. This loop is putatively paired with  
540 (<sup>267</sup>PKDRQGKVSKEY<sup>278</sup>), sequence of which preclude any interaction with calcium  
541 (Fig. 6B). It should be noted that side chain of K273 might interact with the  
542 <sup>313</sup>NGDDGNVVKEEE<sup>324</sup> loop, thus mimicking calcium-loaded EF-hand state.

543 Our HDX data indicate interplay between the N-terminal part of AtSCS-A  
544 (containing the canonical EF-hand motif) and the C-terminal part (containing only EF-  
545 hand-like motifs). Both domains seem to be structurally coupled in AtSCS-A, and  
546 strong structuring of the N-terminal region of the AtSCS-A upon Ca<sup>2+</sup> binding affects  
547 this interaction. Calcium-induced structuring of the AtSCS-A N-terminal domain may  
548 influence the dynamics of distant parts, which are already well structured in the *apo*  
549 form (Fig. 5D). It is possible that the small changes observed in the C-terminal  
550 fragment of AtSCS-A upon binding of calcium do not indicate direct calcium binding  
551 to this domain, but may originate from an allosteric transmission caused by the  
552 calcium binding to the canonical site in the N-terminal domain. Fragment 325-337  
553 FFKTMAEILGSIM, whose stability in AtSCS-B is nearly independent of the presence  
554 of Ca<sup>2+</sup>, is definitely less stable in AtSCS-A *apo*, and is even much more destabilized  
555 in AtSCS-A in the presence of calcium ions (Fig. 5D, Supplemental Fig. S6 and S7).  
556 In contrast, the region 278-283 YLR AVL (Supplemental Fig. S7 and S8) in AtSCS-A  
557 in the presence of Ca<sup>2+</sup> becomes stabilized and at least in 1 min of exchange  
558 resembles this fragment within AtSCS-B.

559 According to the model, the first calcium-binding domain (canonical EF-hand  
560 motif) forms a classical helix-turn-helix structure with helices 26-40 and 57-63 (Fig.  
561 6A). This model agrees well with the HDX data. In the presence of Ca<sup>2+</sup>, regions  
562 characterized by the strongest retardation of HD exchange cover the 28-62 fragment  
563 (representing canonical EF-hand motif), and additionally the 85-115 one, where the  
564 EF-hand-like motif is predicted. The helices of canonical EF-hand and non-canonical  
565 EF-hand exhibit similar HD exchange patterns, with a strongly retarded exchange in  
566 the presence of Ca<sup>2+</sup> with the exception of the helix at 77-87, where HD exchange is  
567 much faster. The model predicts proximity of the canonical EF-hand motif and the  
568 non-canonical one. For canonical EF-hand motif the lowest level of HD exchange is



569 observed within loop 41-56 constituting Ca<sup>2+</sup> binding sites, for non-canonical EF-hand  
570 the lowest level of HD exchange refers to fragment 101-106 within helix 99-117 (Fig.  
571 5D and Supplemental Fig. S7 and S8).

572 Modeling of the region 250-330 predicts the existence of four helices (252-  
573 256, 275-287, 297-313, 321-326) (Fig. 6B). Indeed, in the HDX experiment there is  
574 significant retardation in HD exchange within helix 252-256, 275-287, 297-313 and  
575 321-326 (Fig. 5D and Supplemental Fig. S8). The structural model predicts direct  
576 contact between helices. HDX technique confirms the stability of regions above,  
577 consistent with the modeled interaction between adjacent helices, which should  
578 significantly stabilize the network of hydrogen bonds and create a connected and  
579 coherent structure (Fig. 6B).

580

581

## 582 DISCUSSION

583

584 Depending on a variety of environmental cues, plants trigger appropriate  
585 responses from among diverse signaling pathways, activating specific defense  
586 mechanisms and adjusting plant development to new conditions. SnRK2 kinases play  
587 a key role in the regulation of the ABA-dependent development and responses to  
588 water deficit, as well as several other stresses. They are known as calcium-  
589 independent enzymes; however, several data indicate their interplay with calcium  
590 signaling pathways. Calcium-dependent kinases, CIPKs, together with SnRK2.6  
591 phosphorylate and regulate activity of NADPH oxidase (respiratory burst oxidase  
592 homolog F, RbohF; Sirichandra et al., 2009 and Han et al., 2019), whereas CDPKs  
593 along with SnRK2s activate the guard cell S-type anion channel (SLAC1) in response  
594 to ABA (Geiger et al., 2010; Brandt et al., 2012). Importantly, in the  
595 *snrk2.2/snrk2.3/snrk2.6* knockout mutant the Ca<sup>2+</sup>-dependent SLAC1 regulation was  
596 impaired (Brandt et al., 2015) indicating interconnection between SnRK2s and  
597 calcium signaling pathways. Furthermore, in 2003 Harmon predicted that calcium  
598 could somehow regulate SnRK2s (Harmon, 2003); C-terminal parts of SnRK2  
599 kinases are rich in acidic amino acids, and those can be potentially involved in Ca<sup>2+</sup>-  
600 binding. Our previous results showed that indeed Ca<sup>2+</sup> added to SnRK2s slightly  
601 affected their kinase activity (Bucholc et al., 2011). However, a much more significant  
602 Ca<sup>2+</sup>-dependent effect on their activity arises via their cellular inhibitory partner, SCS,  
603 a calcium sensor (Bucholc et al., 2011).

604 Our present results show that in Arabidopsis, due to alternative transcription  
605 start sites, two forms of AtSCS are expressed, AtSCS-A and AtSCS-B. They encode  
606 proteins that differ only in the N-terminal region; AtSCS-B is thus a shorter version of  
607 AtSCS-A in which the first 110 aa are missing. This region includes the classical EF-  
608 hand and the first EF-hand-like motifs. The basic properties of AtSCS-A have been  
609 previously described by Bucholc et al. (2011). Now, we analyzed biophysical and  
610 biochemical features of AtSCS-B, and performed detailed comparative studies of  
611 both proteins in respect of their conformational dynamic with and without calcium,  
612 inhibition of the SnRK2 activity and their role in the plant response to water deficit.

613 The data presented here indicate that only AtSCS-A can play a role as a  
614 calcium sensor. The calcium-binding constant of this protein as determined  
615 previously by the protein fluorescence titration was  $2.5 (\pm 0.9) \times 10^5 \text{ M}^{-1}$ ,

616 corresponding to a dissociation constant of 4  $\mu\text{M}$  (Bucholc et al., 2011). The calcium  
617 binding induces significant conformational changes of the protein as revealed by CD  
618 spectroscopy and HDX-MS analysis, indicating a possible function of AtSCS-A as a  
619 calcium sensor in plant cells. *In vitro* studies demonstrate the SnRK2 inhibition  
620 occurs only in the presence of calcium. On the other hand our data showed that even  
621 though AtSCS-B binds calcium ions, the binding is two orders of magnitude weaker  
622 than that for AtSCS-A and there are no conformational consequences of the calcium  
623 binding. These data indicate that for the inhibition of the SnRK2 activity is responsible  
624 the common region of AtSCS-A and AtSCS-B. The primary structures of both  
625 proteins in this region are identical, than the question appears why AtSCS-A requires  
626  $\text{Ca}^{2+}$  for the inhibition and AtSCS-B does not. The mechanism of the SnRK2  
627 inhibition by SCS is still an open question and needs further study, but the  
628 conformational dynamics of both AtSCSs in the presence and absence of calcium  
629 ions shed light on calcium dependence on the SnRK2 inhibition in the case of  
630 AtSCS-A. Our HDX-MS results provide extensive analysis of the changes of the  
631 conformational dynamic of proteins with classical and non-classical EF-hand motifs  
632 upon calcium binding and indicate that N-terminal part of AtSCS-A has a great impact  
633 on the C-terminal part.

634 Our results showed clearly that the domain common to both variants, i.e., the  
635 C-terminal fragment of AtSCS-A, is much less stable in the longer form than in the  
636 shorter form. HDX-MS and CD analysis indicate that in AtSCS-B this region forms  
637 stable structures independent of calcium, with no significant increase in stability in the  
638 presence of calcium. In AtSCS-A, the N- and C-terminal segments, though distant in  
639 sequence, are structurally coupled, so the C-terminal part has properties distinct from  
640 those of AtSCS-B. In AtSCS-A the dynamics of the elements of the C-terminal  
641 domain become calcium-sensitive, unlike in AtSCS-B, where calcium-induced  
642 changes are negligible. Binding of calcium destabilizes region 321-340 in the C-  
643 terminal domain while it reverses the destabilization of the loop of the predicted third  
644 EF-hand-like motif (267-278) and the flanking region (278-283). In the presence of  
645 calcium ions, the conformational dynamics of this fragment becomes similar to that of  
646 the same region in AtSCS-B. Based on these data, we predict that the third EF-hand  
647 like motif in AtSCS-A and the motif corresponding to this region in AtSCS-B are  
648 probably critical for inhibition of the SnRK2 activity. The conformation of this region  
649 required for the kinase inhibition is the one which is present in AtSCS-B (independent

650 of calcium), but which in AtSCS-A requires the presence of calcium. This would  
651 explain why AtSCS-A needs calcium ions for the inhibition, whereas AtSCS-B does  
652 not.

653 Moreover, our HDX-MS results show interesting data on the cooperation of  
654 Ca<sup>2+</sup> binding by canonical and non-canonical EF-hand motifs. Upon calcium binding,  
655 the region of the predicted calcium-binding loop of the classical EF-hand motif  
656 present in AtSCS-A and adjacent regions become much more stable (HDX-MS data),  
657 and the overall structure becomes more helical (CD data). Interestingly, according to  
658 HDX results, the segment 85-115 (predicted putative EF-hand-like motif with very low  
659 identity with the canonical motif) also undergoes significant stabilization in response  
660 to Ca<sup>2+</sup> addition. The changes in deuterium uptake after Ca<sup>2+</sup> addition in this region  
661 were similar to those observed for the canonical motif. It is plausible that the changes  
662 observed in the non-canonical motif are not a result of calcium binding in this region,  
663 but they are an indirect effect of calcium binding at the canonical site. The vast  
664 majority of EF-hand motifs (and almost all fully functional ones) exist in pairs, usually  
665 structurally coupled by a short  $\beta$ -sheet ( $\beta$ -scaffold) that maintains a direct contact  
666 between metal ion-binding loops (for a review see, Nelson et al., 1998). It is possible  
667 that the non-canonical motif cooperates with the canonical motif in calcium ion  
668 binding and plays a role of a structural scaffold, influencing the properties of the  
669 canonical site. The HDX-MS technique is not able to distinguish between  
670 conformational changes resulting from direct ligand binding or allosteric effects  
671 triggered by an interaction in a different part of the molecule.

672 Finally, we analyzed the effect of AtSCS-A and AtSCS-B on plant response to  
673 stress using a transgenic approach. We generated transgenic Arabidopsis plants  
674 expressing *AtSCS-A-c-myc* or *AtSCS-B-c-myc* in the *scs-1* knockout mutant  
675 background. We did not observe any significant differences between the plants of the  
676 transgenic lines, the WT plants, and the *scs* knockout mutants grown in optimal  
677 conditions. Since SnRK2s are key regulators of the plant response to water deficit  
678 (Fujii and Zhu, 2009; Fujita et al., 2009; Nakashima et al., 2009) we analyzed the  
679 effect of AtSCS-A and AtSCS-B in the plant response to dehydration. The results  
680 showed that both forms of AtSCS are involved in response to this stress; the *scs*  
681 mutants were more resistant to dehydration than the WT plants and plants  
682 expressing *AtSCS-A-c-myc* or *AtSCS-B-c-myc*. We did not observe significant  
683 differences between the transgenic lines expressing one or another form of AtSCS.

684 The only difference we observed was a less pronounced effect of AtSCS-B than that  
685 of AtSCS-A; only in the line B12, in which the expression of AtSCS-B was very high,  
686 we observed inhibition of the SnRK2 activity and a meaningful effect on the  
687 dehydration response. Importantly, the expression of each of the forms was not able  
688 to fully compensate the scs mutation, suggesting that both forms are involved in the  
689 regulation and their role is not fully overlapping. We obtained similar results using two  
690 independent assays, drought tolerance test and water loss in detached rosettes.  
691 Based on observed differences in the localization of SnRK2-AtSCS-A and SnRK2-  
692 AtSCS-B complexes *in planta* (BiFC assays) we can speculate that both AtSCS  
693 forms might regulate phosphorylation of diverse proteins in plant cells. However, it  
694 should be noted that the effect of both AtSCSs on the plant response to water  
695 withdrawal is similar to but less pronounced than the effects of clade A  
696 phosphatases, which are considered as the major negative regulators of the SnRK2s  
697 activity.

698 The analysis of the kinase activity in the transgenic plants showed that both  
699 SCSs inhibit the ABA-responsive SnRK2s. Still we cannot exclude that AtSCS-A also  
700 inhibits the ABA-non-responsive SnRK2s, since AtSCS-A in contrast to AtSCS-B  
701 interacts not only with the ABA-activated SnRK2s but also with kinases of the group  
702 1, which are not activated by ABA. However, the evolution studies performed by  
703 Holappa et al. (2017) have shown that SCS proteins appeared in earliest land plants  
704 at about the same time as ABA receptors - RCAR/PYR/PYL (RCAR, Regulatory  
705 Component of ABA Receptor/PYR1, Pyrabactin Resistance 1/PYL, PYR1-like),  
706 PP2Cs (Umezawa et al., 2010; Komatsu et al., 2013; Shinozawa et al, 2019), and  
707 ABA-activated SnRK2s (from group 3) that constitute the prototype of the SnRK2  
708 family. The ABA-non-responsive SnRK2s evolved later, in vascular plants. Thus, the  
709 ABA-activated SnRK2s, RCAR/PYR/PYLs, PP2Cs, and SCSs seem to consist of  
710 ancient regulatory modules of ABA signaling, allowing adaptation to a terrestrial  
711 environment.

712

713

## 714 **CONCLUSIONS**

715

716 Our studies showed that two isoforms of ASCSs (AtSCS-A and AtSCS-B) are  
717 expressed in Arabidopsis. They differ significantly in their expression profiles, calcium

718 binding properties, and conformational dynamics. Both of them inhibit the activity of  
719 the ABA-activated SnRK2s and regulate the plant response to water deficit similar to  
720 the clade A PP2C phosphatases, although the effect of AtSCSs is not as strong as  
721 the one observed in the case of the phosphatases. Moreover, the results provide  
722 information on calcium binding properties and conformational dynamics of EF-hand  
723 and EF-hand-like motifs present in plant proteins. This extends our knowledge on  
724 proteins involved in fine-tuning of the SnRK2 activity in stress signaling in plants,  
725 connecting calcium-independent and calcium-dependent pathways.

726

727

## 728 **MATERIALS AND METHODS**

729

### 730 **Plant Materials, Growth Conditions, and Stress Treatments**

731

732 *Arabidopsis thaliana* lines used in this study include: Col-0 as the wild type  
733 background, T-DNA insertion lines; *scs-1* (Salk\_051356) and *scs-2* (Salk\_104688)  
734 previously described (Bucholc et al., 2011), *snrk2.6* (Salk\_008068) obtained from the  
735 Nottingham Arabidopsis Stock Center, double mutant *snrk2.2/2.3* (GABI-Kat  
736 807G04/Salk\_107315) provided by Jian-Kang Zhu, (Purdue University), a quadruple  
737 knockout mutant *snrk2.1/2.4/2.5/2.10*  
738 (SAIL\_519\_C01/Salk\_080588/Salk\_075624/WiscDsLox233E9) described by  
739 Maszkowska et. al., 2018 and double mutant *abi1-2/pp2ca-1*  
740 (Salk\_72009/Salk\_28132) obtained from Pedro L. Rodriguez (Instituto de Biologia  
741 Molecular y Celular de Plantas). The seeds of *Arabidopsis thaliana* were grown under  
742 long day conditions (16-h-light/8-h-dark photoperiod) at 22°C/18°C in soil or in  
743 hydroponic culture (Araponics System) as described by Kulik et al., 2012. For  
744 expression analysis of *AtSCS-A* and *AtSCS-B* in response to ABA or salt, plants  
745 were grown at 21°C/21°C under mid-day conditions (12-h-light/12-h-dark cycle) for 2  
746 weeks in hydroponic culture and seedlings were either mock treated or with 10 µM  
747 ABA or 150 mM NaCl, respectively, at specific times. After treatment plants were  
748 collected, frozen in liquid nitrogen and stored at -80°C until analyzed. For aseptic  
749 cultures, seeds were sterilized in 70% ethanol for 2 minutes then in a water/bleach  
750 solution 13:1 (v/v) for 20 minutes. After sterilization, the seeds were extensively  
751 washed with sterile water. Seeds were stratified in the dark at 4°C for 3 days. For

752 transient expression experiments, protoplasts were isolated from *Arabidopsis*  
753 *thaliana* T87 cells grown in Gamborg B5 medium as described by (Yamada et al.,  
754 2004), six days after subculturing.

755

### 756 **AtSCS-A and AtSCS-B Expression Analysis in Arabidopsis**

757

758 AtSCS-A and AtSCS-B expression was analyzed by two-step RT-qPCR. Total  
759 RNA was extracted from Arabidopsis seedlings or different organs using a Thermo  
760 Scientific GeneJet Plant RNA Purification Mini Kit and treated with Thermo Scientific  
761 RapidOut DNA Removal Kit. The efficiency of DNA removal was monitored by PCR  
762 with primers for PP2A. First-strand cDNA synthesis was performed using 1.5 µg of  
763 total RNA with oligo (dT)<sub>18</sub> primer and Thermo Scientific RevertAid First Strand cDNA  
764 Synthesis Kit according to standard manufacturer's protocol. Relative expression  
765 levels were determined by quantitative PCR in a LightCycler® 480 Roche device,  
766 using SYBR GREEN mix (Roche). For each target gene amplification, two gene-  
767 specific primers were used (listed in Supplemental Table S1) and all cDNA samples  
768 (three replicates) and standards (two replicates) were assayed in a single run.  
769 Relative gene expression in each sample was calculated using standard curve  
770 method (5-point), normalized using a geometric mean of expression values for two  
771 reference genes (*PDF2* and *UBC21*) and scaled to the calibrator sample (Col-0  
772 control).

773

### 774 **Expression of Recombinant Proteins**

775

776 Expression of recombinant proteins in *Escherichia coli* was performed as  
777 previously described (Bucholc et al., 2011). cDNA encoding AtSCS-B or fragment of  
778 ABF2 (Gly73 to Gln120) was PCR amplified using appropriate primers (listed in  
779 Supplemental Data) and cloned into pGEX-4T-1 vector (GE Healthcare Life  
780 Sciences). The PCR reaction was performed using a high-fidelity Pfu DNA  
781 polymerase (Stratagene, La Jolla, CA) and verified by sequencing.

782

### 783 **Purification of Recombinant Proteins**

784



785 All recombinant proteins were purified using glutathione-sepharose beads (GE  
786 Healthcare Life Sciences) as previously described by Bucholc et al., 2011. To obtain  
787 highly purified AtSCS-A and AtSCS-B proteins the last step of purification was  
788 reverse-phase HPLC on an analytical ACT Ace C18 column (for analysis of calcium  
789 binding) or Mono Q column using an FPLC system (GE Healthcare Life Sciences).  
790 Purity of the proteins was analyzed by SDS-PAGE and electrospray ionization mass  
791 spectrometry on a Micromass Q-TOF spectrometer (Micromass, Manchester, Great  
792 Britain). GST-ABF2<sup>73-120</sup> fusion protein after purification using glutathione-sepharose  
793 beads (GE Healthcare Life Sciences) was precipitated with chloroform/methanol and  
794 resolubized in 10mM Tris-HCL, pH8.8, 0.1% SDS.

795

### 796 **Protein Kinase Activity Assays**

797

798 The kinase activity assay in solution was performed as described by Bucholc  
799 et al., 2011.

800 In-gel kinase activity assays were performed according to Wang and Zhu, 2016  
801 with some modifications. Proteins were extracted from 14-d-old seedlings grown in  
802 hydroponic culture in flasks that were either mock-treated or with 100 $\mu$ M ABA, 350  
803 mM NaCl for 0, 30, 60 min. Plant materials from wild-type (Col-0) and different  
804 mutant lines were ground in liquid nitrogen and sonicated three times in the buffer  
805 (50 mM HEPES-KOH, pH 7.5, 5 mM EDTA, 5 mM EGTA, 2 mM DTT, 25 mM NaF,  
806 1mM Na<sub>3</sub>VO<sub>4</sub>, 50 mM  $\beta$ -glycerophosphate, 10% (v/v) glycerol, 1mM PMSF, 1x  
807 protease inhibitor cocktail (Roche) and 1x phosphostop (Roche). Proteins (40  
808  $\mu$ g/lane) in Laemmli buffer (without boiling) were separated on a 10% SDS-PAGE  
809 containing 0.25 mg/mL GST-ABF2<sup>Gly73-Gln120</sup> or 0.5 mg/mL myelin basic protein (MBP)  
810 (Sigma-Aldrich) as a kinase substrate. The gels were run over-night at 30 V and next  
811 washed for 3 x 30 min at room temperature (RT) in SDS removal buffer (25 mM Tris-  
812 HCl, pH 7.5, 0.5 mM DTT, 5 mM NaF, 0.1 mM Na<sub>3</sub>VO<sub>4</sub>, 0.5 mg/mL BSA, 0.1 % Triton  
813 X-100). After that, the gels were incubated in renaturing buffer (25 mM Tris-HCl, pH  
814 7.5, 1mM DTT, 5 mM NaF, 0.1 mM Na<sub>3</sub>VO<sub>4</sub>) for 2 x 30 min at RT, over-night at 4 $^{\circ}$ C  
815 and 1 x 30 min at RT. After 30 min of incubation at RT in cold kinase reaction buffer  
816 (25 mM Tris-HCl, pH 7.5, 1 mM EGTA, 30 mM MgCl<sub>2</sub>, 2 mM DTT, 0.1 mM Na<sub>3</sub>VO<sub>4</sub>,)  
817 the gels were incubated in 10 ml of hot kinase reaction buffer supplemented with  
818 50 $\mu$ Ci of [ $\gamma$ -<sup>32</sup>P] ATP for 5 min at RT and after addition of 20 $\mu$ M of cold ATP for 90

819 min at RT. The reaction was stopped with stop washing solution (5% TCA and 1%  
820 sodium pyrophosphate). After extensive washing with washing buffer the gels were  
821 stained with Coomassie Brilliant Blue R250, dried and exposed to autoradiography.

822

823

## 824 **Yeast Two Hybrid and Bimolecular Fluorescence Complementation (BiFC)** 825 **Assays**

826

827 Yeast two-hybrid analysis was carried out as described previously by Bucholc  
828 et al., 2011. The cDNAs encoding SnRK2s were cloned into pGBT9 vector (Clontech)  
829 and *AtSCS-A* or *AtSCS-B* were cloned into pGAD424 (Clontech). Primers used for  
830 cloning are listed in Supplemental Table S1.

831 For subcellular localization analysis coding sequences for *AtSCS-A* and  
832 *AtSCS-B* were introduced into pSAT6-EGFP-N1 or pSAT6-EGFP-C1. For BiFC  
833 assays, constructs for *SnRK2s* expression were prepared in pSAT4-nEYFP-C1 and  
834 *AtSCS-A* or *AtSCS-B* in pSAT1-cEYFP-N1 or pSAT1-nEYFP-N1, respectively. The  
835 pSAT vectors were provided by Prof. T. Tzfira (Tzfira et al., 2005). Primers are listed  
836 in Supplemental Table S1. Subcellular localization and BiFC analyses were  
837 performed as described by Bucholc et al., 2011. Subcellular localization of the EGFP  
838 fusion proteins and EYFP fluorescence after complementation were evaluated using  
839 a Nikon C1 confocal system built on TE2000E inverted microscope and equipped  
840 with a 60×/1.4 NA Plan-Apochromat oil immersion objective (Nikon Instruments B.V.  
841 Europe, Amsterdam, Netherlands). EGFP and EYFP were excited with a Sapphire  
842 488 nm laser (Coherent, Santa Clara, CA, USA) and observed using the 515/530  
843 emission filter. For publication, single optical sections with distinctly visible nucleus  
844 and nucleoli were selected to ensure that similar focal planes were compared for all  
845 tested variants. Images were processed using Nikon EZ-C1 Free Viewer (version  
846 3.90).

847

## 848 **Calcium Ion Binding Analysis**

849

850 For calcium binding analysis, the recombinant proteins were purified by  
851 reverse-phase HPLC on an analytical ACT Ace C18 column; their purity was  
852 estimated by electrospray ionization mass spectrometry. Protein concentration was

853 determined from UV absorption at 280 nm, using the molar extinction coefficients of  
854  $10500 \text{ M}^{-1} \text{ cm}^{-1}$  and  $9300 \text{ M}^{-1} \text{ cm}^{-1}$  for AtSCS-A and AtSCS-B, respectively, as  
855 calculated for one Trp and three Tyr residues (AtSCS-A) or one Trp and two Tyr  
856 residues (AtSCS-B) (Mach et al., 1992). The UV absorption spectra were measured  
857 on a Cary 3E spectrophotometer (Varian) in thermostated cells of 10 mm path length.  
858 20 mM Tris buffer, pH 7.4, with 100 mM NaCl was used as a solvent for the calcium  
859 binding experiments. All measurements were performed at 20°C.

860 Fluorescence Measurements - The protein fluorescence was measured on a  
861 CaryEclipse fluorimeter. Spectra were collected with an average time of 2 s for each  
862 point and a step size of 0.5 nm from 295 (or 305) to 450 nm. In fluorescence titration  
863 experiments small aliquots of concentrated calcium chloride solution were added until  
864 the protein fluorescence no longer changed. The measurements were repeated at  
865 least three times. All protein solutions used in the fluorescence titration experiments  
866 were checked for possible calcium contamination by comparing the protein  
867 fluorescence signals in the presence and absence of calcium chelator (100  $\mu\text{M}$   
868 EGTA).

869 Calcium Ion Binding Constant - The measured fluorescence signal (F) is defined  
870 as:

$$871 \quad F = F_0 \times x_F + F_1 \times x_1 \quad (a)$$

872 where  $F_0$ ,  $F_1$ , are fluorescence of the protein without and with the ligand,  
873 respectively. The  $x_F$  and  $x_1$ , are mole fractions of free protein (PF, no ligand bound)  
874 relative to total protein ( $P_0$ ),  $x_F = PF/P_0$ , and ligand bound protein ( $P_1$ ),  $x_1 = P_1/P_0$ ,  
875 respectively. The two mole fractions sum to one:  $x_F + x_1 = 1$ .

876 The binding constant of the ligand to the protein in a reaction,  $P + L \rightleftharpoons PL$  is  
877 defined as:

$$878 \quad K_1 = P_1 / (PF \times LF) \quad (b)$$

879 where,  $P_0 = P_1 + PF$  and  $L_0 = LF + P_1$  are total concentrations of the protein and the  
880 ligand, respectively. If  $F' = F/F_0$  and  $f_1 = F_1/F_0$ , then:

$$881 \quad F' = 1 - x_1 + f_1 \times x_1 \quad (c)$$

882 The equation is analogous with that of eq. 8 in (Eftink, 1997) describing single-site  
883 ligand binding, where the variables are  $F'$  (from experimental measurements), total  
884 ligand concentration,  $L_0$ , and protein concentration,  $P_0$ , and the parameters are the  
885 ligand binding constant,  $K_1$ , and relative fluorescence signal,  $f_1$ . Here, the ligand is

886 Ca<sup>2+</sup> ion. The parameter values were determined by least-square fitting of theoretical  
887 curves to experimental data using the NiceFit program.

888

### 889 **Circular Dichroism Measurements**

890

891 Circular dichroism (CD) experiments were carried out at 20°C on Jasco J-815  
892 spectropolarimeter with a 10 mm path length cuvette. The protein solutions (close to  
893 2 µM) were prepared in 5 mM Tris buffer, pH 7.4, with 100 mM NaCl. CD spectra  
894 were collected twice with an average time of 2 s for each point and a step size of 1  
895 nm from 200 to 270 nm. All spectra were corrected against the buffer. The data were  
896 converted to molar residue ellipticity using the relationship  $[\Theta] = \theta / (10 \times n \times l \times c)$ , where  
897  $[\Theta]$  is molar residue ellipticity in (degree cm<sup>2</sup> dmol<sup>-1</sup>),  $\theta$  is the observed ellipticity in  
898 millidegrees,  $n$  is the number of amino acid residues in the protein,  $l$  is the path length  
899 in cm, and  $c$  the protein concentration in M.

900 The secondary structure content of the proteins was estimated using the  
901 CDNN program (CD spectroscopy deconvolution software) (Böhm et al., 1992).

902

### 903 **Hydrogen Deuterium Exchange Coupled to Mass Spectrometry**

904

905 The HDX-MS was performed as described previously (Sitkiewicz et al., 2013),  
906 with minor modifications. Initially, the list of peptides was established by diluting each  
907 analyzed protein to 5-10 µM in a non-deuterated buffer (50 mM Tris pH 7.4, 150 mM  
908 NaCl). Each sample (50 µL) was acidified by adding 10 µL of “stop” buffer (2M  
909 glycine pH 2.5, 150mM NaCl, 4M GuHCl) and then injected into a Waters  
910 nanoACQUITY UPLC system equipped with an HDX Manager system (Waters) with  
911 the column outlet coupled directly with SYNAPT G2 HDMS mass spectrometer.  
912 Rapid online digestion on an immobilized pepsin column (Poroszyme, ABI) was  
913 performed at a flow 200 µL/min. Peptides were captured on a trapping BEH C18 1.7-  
914 mm, 2.1×5mm Vanguard Pre-Column (Waters) and separated by 1.0×100 mm BEH  
915 C18 1.7-mm analytical reversed phase column (Waters) with a gradient of 8-40 %  
916 acetonitrile (0.1 % formic acid) in 6 minutes at a flow 40 µL/min. All capillaries,  
917 valves, and columns were maintained at 0.5°C inside a HDX cooling chamber, while  
918 the pepsin column was kept at 13°C inside the temperature-controlled digestion  
919 compartment. Mass spectra were acquired in MSE mode over the m/z range of 50-

920 2000 both with and without ion mobility separation. Spectrometer ion source  
921 parameters were as follows: ESI positive mode, capillary voltage 3 kV, sampling cone  
922 voltage 35 V, extraction cone voltage 3 V, source temperature 80°C, desolvation  
923 temperature 175°C, and desolvation gas flow 800 L/h. Infusion and scanning every  
924 30 seconds of leu-enkephalin (556.277 m/z) was used for continuous lock mass  
925 correction. Rigorous washing steps were performed between each injection. The  
926 peptides were identified with ProteinLynx Global Server software (Waters) using  
927 randomized database and with false discovery rate threshold set to below 4%.

928 Deuterium labeling was initiated with a 10-fold dilution of the protein sample  
929 into a buffer containing 50 mM Tris, pH 7 (uncorrected meter reading), 150 mM NaCl  
930 and 5 mM CaCl<sub>2</sub> or 5 mM EGTA in 99.8% D<sub>2</sub>O (Cambridge Isotope Laboratories,  
931 Inc.). After a specified time (10 s, 1 min, 20 min, 60 min) the labeling reaction was  
932 quenched by adding “stop” buffer and then the sample was immediately snap-frozen  
933 in liquid nitrogen and stored at -80°C until analyzed. Quenched samples were rapidly  
934 thawed and injected into a Waters nanoACQUITY LC system equipped with HDX  
935 Manager, coupled directly with SYNAPT G2 HDMS mass spectrometer. “Out”  
936 controls of back exchange level were performed by incubation of the protein in D<sub>2</sub>O  
937 buffer for 48 hours to obtain maximum exchange for each peptide. The experimental  
938 maximum is always lower than the maximal theoretical exchange due to a certain  
939 degree of back exchange. Each experiment was repeated at least three times and  
940 the results represent the mean of all replicates.

941 Data analysis. Peptide list for each protein was created in the DynamX 3.0  
942 software based on PLGS peptide identifications, with following acceptance criteria:  
943 minimum intensity threshold - 5000, minimum fragmentation products per amino  
944 acids for precursor - 0.3, the maximum mass difference between the measured and  
945 theoretical value for parent ions - 10 ppm. Analysis of the isotopic envelopes in  
946 DynamX 3.0 software was carried out using the following parameters: retention time  
947 deviation ± 18 s, m/z deviation ± 15 ppm, drift time deviation ± 2 time bins and  
948 centroids of the mass envelopes were obtained. The values reflecting the  
949 experimental mass of each peptide in all possible states, replicates, time points and  
950 charge states were exported from the DynamX 3.0 and further data analysis was  
951 carried out using in house scripts written in R language (<http://www.R-project.org>).  
952 Fraction exchanged (D) was calculated with the following formula:

953 
$$D = ((M_{ex} - M_{ex 0}) / ((M_{ex 100} - M_{ex 0}))$$

954 where: (Mex0) and (Mex100) indicate the average peptide mass measured in the  
955 unlabeled sample and mass from “out” control, respectively. Error bars for fraction  
956 exchanged represent standard deviations calculated from at least three independent  
957 experiments. The difference in the fraction exchanged ( $\Delta$  fraction exchanged) was  
958 calculated by subtracting the fraction-exchanged values for peptides in the selected  
959 state from the values for the same peptides in the control state. The error bars were  
960 calculated as the square root of the sum of the variances from compared states.  
961 Student’s t-test for two independent samples with unequal variances and unequal  
962 sample sizes (also known as Welsh t-test) was carried out to evaluate differences in  
963 fraction exchanged between the same peptides in two different states.

964

### 965 **Construction and selection of transgenic *Arabidopsis thaliana* plants**

966

967 To generate the transgenic lines in *scs-1* background coding sequences for  
968 AtSCS-A and AtSCS-B were cloned into pENTR- $\oplus$ -D/TOPO™ vector (Thermo  
969 Fisher) and next, the cDNAs were recombined by Gateway LR reaction into  
970 pGWB617 destination vector (Nakamura et al.,2010). The pGWB617-AtSCS-A and  
971 pGWB617-AtSCS-B constructs were transformed via *Agrobacterium tumefaciens*  
972 strain GV3101 into mutant background *scs-11* by the floral dip method as previously  
973 described by Clough & Bent, 1998 and Zhang et al., 2006. The selection of the  
974 transgenic lines was performed by spraying soil-grown seedlings with 0.033%  
975 BASTA solution supplemented with 0.01% Silwet L-77 at 7 and 9-day after  
976 germination. Recombinant proteins were confirmed by western blot analysis using a  
977 c-Myc monoclonal antibody (9E10, Santa Cruz) according to the protocol  
978 recommended by the manufacturer.

979

### 980 **Rosette water loss measurement**

981

982 The *Arabidopsis* plants of the appropriate genotype were grown for 5–6 weeks under  
983 short day conditions (8 h light at 22°C / 16 h dark at 20°C) in a CLF PlantClimatics  
984 chamber incubator and watered copiously one day before harvest. The Cut Rosette  
985 Water Loss (CRWL) was determined as described previously by Bouchabke et al.  
986 (2008) with minor modifications. Freshly cut rosettes were weighed immediately,  
987 incubated in windless conditions under constant temperature (22-24°C) and weighed



988 five times hourly. After overnight drying at 70°C to a constant mass, the rosettes  
989 were weighed for dry mass, and water loss was calculated.

990

### 991 **Drought tolerance test**

992

993 The Arabidopsis plants were grown in pots (approximately 50 plants per pot) for 17  
994 days under long-day conditions (16 h light at 22°C / 8 h dark at 20°C) and for an  
995 additional 2 weeks without watering. After that time, the plants were watered.  
996 Pictures were taken before re-watering and on the second day of re-watering.

997

### 998 **Modeling of AtSCS-A/B Structure**

999

1000 Since no structures of AtSCS variants have been available in the PDB, they  
1001 were modeled by homology using algorithms implemented in Yasara (Krieger et al.,  
1002 2002; Krieger et al., 2009). In every round of modeling 12 protein structures  
1003 sequentially close to the target were used as initial templates. For each template up  
1004 to 5 alternative alignments with the target sequence were used, and up to 50 different  
1005 conformations were tested for each loop being modified. The resulting models were  
1006 individually scored according to their structural quality (dihedral distribution,  
1007 backbone and side-chain packing), and those with the highest scores were further  
1008 used to form a hybrid model, which was built using the best fragments (e.g. loops)  
1009 identified among the single-template models. However, due to limited coverage with  
1010 sequences of proteins with known structure, AtSCS-A has to be modeled as the two  
1011 separate domains, relative orientation of which remains unknown. In accordance with  
1012 HDX-MS data, the N-terminal one covered residues 26-175, while the C-terminal  
1013 corresponded to residues 211-330.

1014

### 1015 **ACKNOWLEDGMENTS**

1016

1017 We thank dr. Olga Sztatelman (IBB PAN, Warsaw, Poland) for providing pGBT9-  
1018 SnRK2.3, pGBT9-SnRK2.7, pGBT9-SnRK2.9 plasmids and *snrk2.1/4/5/10* knockout  
1019 mutant. We are also grateful to Professor Zhu-J-K and Pedro I. Rodriguez for sharing  
1020 with us the *snrk2.2/2.3* and *abi1-2pp2ca-1* knockout mutants, respectively, and all

1021 members of our laboratory for stimulating discussions. We also thank Nottingham  
1022 Arabidopsis Stock Center for providing the *snrk2.6* mutant.

1023

## 1024 **FIGURE LEGENDS**

1025

1026 Figure 1.

1027 *The expression of AtSCS-A and AtSCS-B varies across plant organs and in plant*  
1028 *response to ABA or NaCl treatment. Alternative isoforms of AtSCS (At4g38810),*  
1029 *AtSCS-A and AtSCS-B, predicted at transcript (A) and protein (B) levels. The*  
1030 *prediction was done based on TAIR plant promoter database (PlantPromoterDB) and*  
1031 *Prosite (prediction of EF-hand motifs).*

1032 Quantitative RT-PCR analysis of *AtSCS-A* and *AtSCS-B* transcript levels in different  
1033 organs (C) in seeds during germination (D), in 2-week-old seedlings exposed to 10  
1034  $\mu$ M ABA (E) or 150 mM NaCl (F). Figures E and F - expression levels in plants  
1035 exposed to ABA or NaCl (dark grey), whereas in control plants, mock treatment (light  
1036 grey). Data represent means of triplicate biological repeats, and the error bars  
1037 indicate SD. For statistical analysis a two-tailed *t*-test in Microsoft Office Excel was  
1038 applied. The asterisks indicate significant difference from the wild type (\**P* < 0.05; \*\**P*  
1039 < 0.01, \*\*\**P* < 0.001).

1040

1041 Figure 2.

1042 *AtSCS-B interacts preferentially with kinases that belong to group 2 and 3 of the*  
1043 *SnRK2 family. Interactions between Arabidopsis SnRK2s and AtSCS-B, or AtSCS-A*  
1044 *as a control, were analyzed by a yeast two-hybrid assay (A), as described in Bucholc*  
1045 *et al., 2011. Yeast transformed with a construct with cDNA encoding one of the*  
1046 *analyzed SnRK2 and complementary empty vector (BD-SnRK2+AD), or a construct*  
1047 *with AtSCS-B or AtSCS-A and the other empty vector (BD+AD-AtSCS) were used as*  
1048 *controls. The growth of yeast expressing the indicated constructs was monitored on*  
1049 *selective media: without Leu and Trp (-LW); without Leu, Trp and His and with 8mM*  
1050 *AT (-LWH); without Leu, Trp and Ade (-LWA). AD, Gal4 activation domain; BD, Gal4*  
1051 *binding domain.*

1052 The subcellular localization of *AtSCS-B* was analyzed in Arabidopsis protoplasts (B),  
1053 as described in Bucholc et al., 2011. Protoplasts isolated from the T87 Arabidopsis

1054 cell line were transiently transformed with plasmid encoding AtSCS-B-EGFP and its  
1055 localization was analyzed by confocal microscopy.  
1056 Interaction between AtSCS-B and SnRK2s *in planta* was analyzed by BiFC assay.  
1057 T87 protoplasts were transiently co-transformed with pairs of plasmids encoding:  
1058 AtSCS-B-cEYFP and nEYFP-SnRK2.4 (C), AtSCS-B-cEYFP and nEYFP-SnRK2.10  
1059 (D), AtSCS-B-cEYFP and nEYFP-SnRK2.6 (E), AtSCS-B-cEYFP and nEYFP-  
1060 SnRK2.8 (F). The binding led to reconstitution of functional YFP from chimeric  
1061 proteins bearing non-fluorescent halves of YFP. For negative control, AtSCS-B-cEYFP  
1062 was co-expressed with AtSCS-B-nEYFP (G). Scale bar = 10  $\mu\text{m}$ ; BF, bright field. The  
1063 data shown here represent one of three independent experiments, all with similar  
1064 results.

1065

1066 Figure 3.

1067 *AtSCS-A and AtSCS-B inhibit the SnRK2 activity in vitro and in vivo.* AtSCS-B  
1068 inhibition of SnRK2.6 (A) and SnRK2.8 (B) is calcium independent. SnRK2.6,  
1069 SnRK2.8, and AtSCS-B were expressed in *E.coli* and the kinase activity was  
1070 measured in the presence of increasing amounts of AtSCS-B (0, 40, 80 and 160 ng  
1071 per  $\mu\text{L}$ ) without or with  $\text{Ca}^{2+}$  (2 mM EGTA or 1 mM  $\text{CaCl}_2$ , respectively) in the  
1072 reaction mixture. The kinase activity was monitored using MBP and [ $\gamma$ <sup>32</sup>P]ATP as  
1073 substrates. Reaction products were separated by SDS-PAGE and MBP  
1074 phosphorylation was determined by autoradiography. The data represent one of  
1075 three independent experiments showing similar results.

1076 The expression of AtSCS-A and AtSCS-B in seedlings of homozygous transgenic  
1077 lines 35S::AtSCS-A-c-myc (A26 and A35) and 35S::AtSCS-B-c-myc (B12 and B31)  
1078 was measured at protein (C) and transcript (D) levels. The production of AtSCS-A-c-  
1079 myc and AtSCS-B-c-myc proteins was monitored in seedlings of the transgenic  
1080 plants by Western blotting using anti-c-myc antibodies. AtSCS mRNA level was  
1081 monitored in the transgenic plants expressing *AtSCS-A-c-myc* or *AtSCS-B-c-myc*, or  
1082 *c-myc* (vector control: P1, P17), the *scs-1* and *scs-2* mutants, as well in the WT  
1083 plants by quantitative RT-PCR analysis. Data represent means of triplicate biological  
1084 repeats, and the error bars indicate SD.

1085 Analysis of the SnRK2 activity in 2-week-old seedlings of the WT, transgenic plants  
1086 expressing *AtSCS-A-c-myc* or *AtSCS-B-c-myc*, and selected *snrk2* knockout mutants  
1087 subjected to 100  $\mu\text{M}$  ABA (E) or 350 mM NaCl (F) shows significant *in planta*

1088 inhibition by AtSCS isoforms. The kinase activity was monitored by in-gel-kinase  
1089 activity assay using as substrate GST-ABF2 (G73-Q120) or MBP, respectively. The  
1090 representative results from one of three independent experiments are shown.

1091

1092 Figure 4.

1093 *AtSCS-A and AtSCS-B Regulate the Response of Arabidopsis to Water Deficit.* The  
1094 drought survival rate test (A). The Arabidopsis plants were grown in pots for 17 days  
1095 under long day conditions and for an additional 2 weeks without watering. The  
1096 pictures were taken before watering was stopped (before drought), after two weeks  
1097 without water (drought), and two days after re-watering (re-watering). Ten pots with  
1098 approximately 50 plants per pot for each line per experiment were used.  
1099 Representative plants are presented. The drought survival rate (B) was estimated by  
1100 analysis of at least 1000 plants per each line. For the statistical analysis a t-test was  
1101 applied. The asterisks indicate significant differences from the wild type (\*P < 0.05;  
1102 \*\*P < 0.01, \*\*\*P < 0.001). The average values  $\pm$  SE are shown.

1103 Water loss from detached Arabidopsis rosettes (C). Rates of water loss from the  
1104 whole rosettes of six-week-old plants of wild type and different mutant lines were  
1105 measured at the time points indicated. Finally, the rosettes were dried at 70°C  
1106 overnight and weighed. The cut rosette water loss (CRWL) was calculated. The  
1107 representative results from one of four independent experiments are shown. Eight  
1108 plants were used for each line per experiment. For the statistical analysis, a t-test  
1109 was applied. The asterisks indicate significant differences from the wild type (\*P <  
1110 0.05; \*\*P < 0.01, \*\*\*P < 0.001). The average values  $\pm$  SE are shown.

1111

1112 Figure 5.

1113 *AtSCS-B Binds Ca<sup>2+</sup> Without a Substantial Effect on the Protein Conformation.* The  
1114 fluorescence spectra of AtSCS-B and AtSCS-A proteins (A). The fluorescence  
1115 spectra of 1.2  $\mu$ M solution of AtSCS-A or AtSCS-B protein, excited at 280nm (upper  
1116 curves) or at 295nm (bottom curves). apo AtSCS-A protein (blue line), apo AtSCS-B  
1117 protein (black line), holo AtSCS-A (magenta line), and holo AtSCS-B (green line) are  
1118 presented. The fluorescence spectra represent one of three independent  
1119 measurements.

1120 The fluorescence titration curves of AtSCS-B protein by calcium ions (B). The  
1121 fluorescence excitation and the emission were at 280 and 342 nm (open triangles) or

1122 280 and 340 nm (black circles, open squares), respectively. The calcium ions titration  
1123 of 1.5  $\mu$ M solutions of AtSCS-B as well as the experimental errors and the theoretical  
1124 curves, calculated for a single-site ligand binding model (solid lines), are shown.

1125 Conformational changes of AtSCS-A and AtSCS-B proteins upon  $\text{Ca}^{2+}$  binding. (C)  
1126 CD spectra of 2  $\mu$ M solutions of AtSCS-B or AtSCS-A with 1 mM  $\text{Ca}^{2+}$  (green and  
1127 magenta lines, respectively) or without  $\text{Ca}^{2+}$  (100  $\mu$ M EDTA; blue for apo AtSCS-A  
1128 and black for apo-AtSCS-B).

1129 Changes of conformational dynamics of AtSCS-A and AtSCS-B upon  $\text{Ca}^{2+}$  binding.  
1130 (D) H/D exchange in AtSCS-A (left panels) and AtSCS-B (right panels) in the  
1131 presence (magenta) or in the absence of  $\text{Ca}^{2+}$  (EGTA, blue). The proteins were  
1132 incubated in  $\text{D}_2\text{O}$  buffer for various times (10 sec, 1 min, 20 min, 60 min) and the  
1133 extent of H/D exchange was determined by mass spectrometry. The horizontal red  
1134 and blue bars indicate individual peptides identified by mass spectrometry. The X-  
1135 axis indicates their position in the amino acid sequence of the AtSCS-A. The Y-axis  
1136 shows relative deuterium uptake calculated as described in Material and Methods;  
1137 the value 1 represents maximal deuteration level, meaning that all hydrogens in  
1138 amide bonds of particular peptide were exchanged to deuterium. Error bars are  
1139 standard deviations from at least three independent experiments. Dark grey –  
1140 position of calcium binding loops of the canonical EF-hand motif, light grey –  
1141 positions calcium binding loops of potential non-canonical EF-hand motifs.

1142

1143 Figure 6.

1144 *Modeled by homology structures of N-terminal (residues 26-175) (A) and C-terminal*  
1145 *(residues 251-330) (B) parts of AtSCS-A* The ribbon representation follows the  
1146 protein backbone. In magenta and blue are marked peptides predicted as canonical  
1147 or non-canonical, respectively, EF-hand calcium binding loops. Residues putatively  
1148 involved in calcium binding are denoted by sticks, yellow spheres represent calcium  
1149 ions. Tyrosine residues are labeled by orange color.

1150

1151

## 1152 **Supplemental Data**

1153

1154 Supplemental Table S1.

1155 List of primers.



1156

1157 Supplemental Figure S1.

1158 *AtSCS-A and AtSCS-B transcript levels in different organs.*

1159 Different presentation of data showed in Fig.1.

1160

1161 Supplemental Figure S2

1162 *AtSCS-A-c-myc and AtSCS-B-c-myc protein level in homozygous 35S::AtSCS-A-c-*

1163 *myc and 35S::AtSCS-B-c-myc transgenic plants.* The level of *AtSCS-A-c-myc* and

1164 *AtSCS-B-c-myc* was analyzed by Western blotting using anti-c-myc antibodies, as

1165 described in Materials and Methods.

1166

1167 Supplemental Figure S3.

1168 *Analysis of expression of Rab18 and RD29B in Arabidopsis plants with different level*

1169 *of AtSCS-A and AtSCS-B.* The relative transcript level of *RAB18* and *RD29B* in RNA

1170 extracted from 2-week-old seedlings that were either mock or 10  $\mu$ M ABA-treated for

1171 3 h was analyzed by quantitative RT-PCR

1172

1173 Supplemental Figure S4.

1174 *The stoichiometry of the binding of calcium ions to AtSCS-B.* The index  $n$  equal to 1

1175 was calculated based on the general equation describing the association of the

1176 ligand to the protein used for the analysis of the fluorescence measurements. The

1177 squares and the rings describe the data from two independent experiments.

1178

1179 Supplemental Figure S5.

1180 *Differences in the Hydrogen/Deuterium (H/D) exchange pattern in AtSCS-A and*

1181 *AtSCS-B upon Ca<sup>2+</sup> binding.* Differential plot of H/D exchange presented in Fig. 8.  $\Delta$

1182 Fraction Exchanged was calculated by subtracting Fraction Exchanged values in

1183 peptides of *AtSCS-A* (left panels) and *AtSCS-B* (right panels) in the presence and

1184 absence of calcium. Peptides with p-values below 0.01 in the t-test are labeled in

1185 bright purple. Dark grey – position of calcium binding loops of the canonical EF-hand

1186 motif, light grey – positions of calcium binding loops of potential non-canonical EF-

1187 hand motifs.

1188

1189 Supplemental Figure S6.

1190 *Differences in the Hydrogen/Deuterium (H/D) exchange pattern between AtSCS-A*  
1191 *and AtSCS-B in common regions in the presence and absence of calcium ions.  $\Delta$*   
1192 *Fraction Exchanged was calculated by subtracting Fraction Exchanged values in the*  
1193 *same peptides of AtSCS-A and AtSCS-B in the presence and absence of calcium,*  
1194 *respectively (samples are the same as presented in Fig. 8). Peptides with p-values*  
1195 *below 0.01 in the t-test are labeled in bright purple. Light grey – positions of calcium*  
1196 *binding loops of potential non-canonical EF-hand motifs.*

1197

1198 Supplemental Figure S7.

1199 *Kinetics of H/D exchange in AtSCS-A and AtSCS-B in the presence or absence of*  
1200 *Ca<sup>2+</sup>. Kinetics of H/D exchange in the presence of Ca<sup>2+</sup> (magenta lines for AtSCS-A,*  
1201 *green lines for AtSCS-B) and in the absence of Ca<sup>2+</sup> (blue lines for AtSCS-A, black*  
1202 *lines for AtSCS-B) for peptides resulting from AtSCS-A fragments starting from*  
1203 *residue 2 to residue 81 (A), from AtSCS-A and AtSCS-B fragments from residues 85*  
1204 *to 160 (B), from AtSCS-A and AtSCS-B fragments from 148 to 255 (C), and from*  
1205 *AtSCS-A and AtSCS-B fragments from 245 to 375 (D). H/D exchange was analyzed*  
1206 *at four time points plotted on a logarithmic scale. Time in minutes (10 sec, 1 min, 20*  
1207 *min, 60 min) is shown at the top of the graph. Error bars represent standard*  
1208 *deviations calculated from at least three independent experiments.*

1209

1210 Supplemental Figure S8.

1211 *Model of N-terminal domain of AtSCS-A (region 16-119) (A) and C-terminal domain*  
1212 *of AtSCS-A and AtSCS-B (region 241-339) (B) with overlaid H/D exchange results.*  
1213 *Regions with relatively high H/D exchange (exchange fraction higher than 0.5 after 1*  
1214 *min incubation with D<sub>2</sub>O in the presence of Ca<sup>2+</sup>) are marked with yellow, regions*  
1215 *with retarded H/D exchange (exchange fraction lower than 0.5 after 1 min incubation*  
1216 *with D<sub>2</sub>O in the presence of Ca<sup>2+</sup>) are marked with purple. For AtSCS-A kinetics of*  
1217 *H/D exchange is presented in the presence (red) and absence of Ca<sup>2+</sup> (blue) (A) and*  
1218 *(B), for AtSCS-B in the presence of Ca<sup>2+</sup> (green) and absence of Ca<sup>2+</sup> (black) (B).*

1219

1220

## Parsed Citations

**Batistič O, Kudla J (2009) Plant calcineurin B-like proteins and their interacting protein kinases. *Biochim Biophys Acta - Mol Cell Res* 1793: 985–992**

Pubmed: [Author and Title](#)

Google Scholar: [Author Only](#) [Title Only](#) [Author and Title](#)

**Batistič O, Kudla J (2012) Analysis of calcium signaling pathways in plants. *Biochim Biophys Acta - Gen Subj* 1820: 1283–1293**

Pubmed: [Author and Title](#)

Google Scholar: [Author Only](#) [Title Only](#) [Author and Title](#)

**Bouchabke O, Chang F, Simon M, Voisin R, Pelletier G, Durand-Tardif M (2008) Natural variation in *Arabidopsis thaliana* as a tool for highlighting differential drought responses. *PLoS One*. Feb 27;3(2):e1705**

Pubmed: [Author and Title](#)

Google Scholar: [Author Only](#) [Title Only](#) [Author and Title](#)

**Böhm G, Muhr R, Jaenicke R (1992) Quantitative analysis of protein far UV circular dichroism spectra by neural networks. *Protein Eng* 5: 191–195**

Pubmed: [Author and Title](#)

Google Scholar: [Author Only](#) [Title Only](#) [Author and Title](#)

**Brandt B, Brodsky DE, Xue S, Negi J, Iba K, Kangasjärvi J, Ghassemian M, Stephan AB, Hu H, Schroeder JI (2012) Reconstitution of abscisic acid activation of SLAC1 anion channel by CPK6 and OST1 kinases and branched ABI1 PP2C phosphatase action. *Proc Natl Acad Sci U S A* 109:10593-10598**

Pubmed: [Author and Title](#)

Google Scholar: [Author Only](#) [Title Only](#) [Author and Title](#)

**Brandt B, Munemasa S, Wang C, Nguyen D, Yong T, Yang PG, Poretsky E, Belknap TF, Waadt R, Alemán F, Schroeder JI (2015) Calcium specificity signaling mechanisms in abscisic acid signal transduction in *Arabidopsis* guard cells. *eLife* 4:e03599, and erratum (2015) 4:e10328.**

Pubmed: [Author and Title](#)

Google Scholar: [Author Only](#) [Title Only](#) [Author and Title](#)

**Bucholc M, Ciesielski A, Goch G, Anielska-Mazur A, Kulik A, Krzywińska E, Dobrowolska G (2011) SNF1-related protein kinases 2 are negatively regulated by a plant-specific calcium sensor. *J Biol Chem* 286: 3429–41**

Pubmed: [Author and Title](#)

Google Scholar: [Author Only](#) [Title Only](#) [Author and Title](#)

**Clough SJ, Bent AF (1998) Floral dip: a simplified method for *Agrobacterium*-mediated transformation of *Arabidopsis thaliana*. *Plant J* 16: 735–43**

Pubmed: [Author and Title](#)

Google Scholar: [Author Only](#) [Title Only](#) [Author and Title](#)

**Day IS, Reddy VS, Shad Ali G, Reddy AS (2002) Analysis of EF-hand-containing proteins in *Arabidopsis*. *Genome Biol* 3: RESEARCH0056.**

Pubmed: [Author and Title](#)

Google Scholar: [Author Only](#) [Title Only](#) [Author and Title](#)

**Eftink MR (1997) Fluorescence methods for studying equilibrium macromolecule-ligand interactions. *Methods Enzymol* 278: 221–257**

Pubmed: [Author and Title](#)

Google Scholar: [Author Only](#) [Title Only](#) [Author and Title](#)

**Fujii H, Verslues PE, Zhu J-K (2007) Identification of two protein kinases required for abscisic acid regulation of seed germination, root growth, and gene expression in *Arabidopsis*. *Plant Cell* 19: 485–94**

Pubmed: [Author and Title](#)

Google Scholar: [Author Only](#) [Title Only](#) [Author and Title](#)

**Fujii H, Verslues PE, Zhu JK (2011) *Arabidopsis* decuple mutant reveals the importance of SnRK2 kinases in osmotic stress responses in vivo. *Proc Natl Acad Sci U S A* 108: 1717-1722**

Pubmed: [Author and Title](#)

Google Scholar: [Author Only](#) [Title Only](#) [Author and Title](#)

**Fujii H, Zhu J-K (2009) *Arabidopsis* mutant deficient in 3 abscisic acid-activated protein kinases reveals critical roles in growth, reproduction, and stress. *Proc Natl Acad Sci U S A* 106: 8380–8385**

Pubmed: [Author and Title](#)

Google Scholar: [Author Only](#) [Title Only](#) [Author and Title](#)

**Fujita Y, Fujita M, Shinozaki K, Yamaguchi-Shinozaki K (2011) ABA-mediated transcriptional regulation in response to osmotic stress in plants. *J Plant Res* 124: 509–525**

Pubmed: [Author and Title](#)

Google Scholar: [Author Only](#) [Title Only](#) [Author and Title](#)

**Fujita Y, Nakashima K, Yoshida T, Katagiri T, Kidokoro S, Kanamori N, Umezawa T, Fujita M, Maruyama K, Ishiyama K, et al (2009) Three SnRK2 protein kinases are the main positive regulators of abscisic acid signaling in response to water stress in *Arabidopsis*. *Plant Cell***

**Physiol 50: 2123–2132**

Pubmed: [Author and Title](#)

Google Scholar: [Author Only Title Only Author and Title](#)

**Geiger D, Scherzer S, Mumm P, Marten I, Ache P, Matschi S, Liese A, Wellmann C, Al-Rasheid KA, Grill E, Romeis T, Hedrich R (2010) Guard cell anion channel SLAC1 is regulated by CDPK protein kinases with distinct Ca<sup>2+</sup> affinities. Proc Natl Acad Sci U S A. 107: 8023-8028**

Pubmed: [Author and Title](#)

Google Scholar: [Author Only Title Only Author and Title](#)

**Halling DB, Lebeskind BJ, Hall AW, Aldrich RW (2016) Conserved properties of individual Ca<sup>2+</sup>-binding sites in calmodulin. Proc Natl Acad Sci U S A 113(9): E1216-1225**

Pubmed: [Author and Title](#)

Google Scholar: [Author Only Title Only Author and Title](#)

**Han JP, Köster P, Drerup MM, Scholz M, Li S, Edel KH, Hashimoto K, Kuchitsu K, Hippler M, Kudla J (2019) New Phytol 221:1935-1949**

Pubmed: [Author and Title](#)

Google Scholar: [Author Only Title Only Author and Title](#)

**Harmon AC (2003) Calcium-regulated protein kinases of plants. Gravitational Sp Biol Bull 16: 83–90**

Pubmed: [Author and Title](#)

Google Scholar: [Author Only Title Only Author and Title](#)

**Holappa LD, Ronald PC, Kramer EM (2017) Evolutionary Analysis of Snf1-Related Protein Kinase2 (SnRK2) and Calcium Sensor (SCS) Gene Lineages, and Dimerization of Rice Homologs, Suggest Deep Biochemical Conservation across Angiosperms. Front Plant Sci 8:395**

Pubmed: [Author and Title](#)

Google Scholar: [Author Only Title Only Author and Title](#)

**Hou Y-J, Zhu Y, Wang P, Zhao Y, Xie S, Batelli G, Wang B, Duan C-G, Wang X, Xing L, et al (2016) Type One Protein Phosphatase 1 and Its Regulatory Protein Inhibitor 2 Negatively Regulate ABA Signaling. PLoS Genet. doi: 10.1371/journal.pgen.1005835**

Pubmed: [Author and Title](#)

Google Scholar: [Author Only Title Only Author and Title](#)

**Hubbard KE, Nishimura N, Hitomi K, Getzoff ED, Schroeder JI (2010) Early abscisic acid signal transduction mechanisms: Newly discovered components and newly emerging questions. Genes Dev 24: 1695–1708**

Pubmed: [Author and Title](#)

Google Scholar: [Author Only Title Only Author and Title](#)

**De Klerk E, 't Hoen PA (2015) Alternative mRNA transcription, processing, and translation: insights from RNA sequencing. Trends Genet 31: 128–139**

Pubmed: [Author and Title](#)

Google Scholar: [Author Only Title Only Author and Title](#)

**Komatsu K, Suzuki N, Kuwamura M, Nishikawa Y, Nakatani M, Ohtawa H, Takezawa D, Seki M, Tanaka M, Taji T, Hayashi T, Sakata Y (2013) Group APP2Cs evolved in land plants as key regulators of intrinsic desiccation tolerance. Nat Commun 4:2219.**

Pubmed: [Author and Title](#)

Google Scholar: [Author Only Title Only Author and Title](#)

**Krieger E, Joo K, Lee J, Lee J, Raman S, Thompson J, Tyka M, Baker D, Karplus K (2009) Improving physical realism, stereochemistry, and side-chain accuracy in homology modeling: Four approaches that performed well in CASP8. Proteins 77 Suppl 9: 114–122**

Pubmed: [Author and Title](#)

Google Scholar: [Author Only Title Only Author and Title](#)

**Krieger E, Koraimann G, Vriend G (2002) Increasing the precision of comparative models with YASARA NOVA—a self-parameterizing force field. Proteins 47: 393–402**

Pubmed: [Author and Title](#)

Google Scholar: [Author Only Title Only Author and Title](#)

**Krzywińska E, Bucholc M, Kulik A, Ciesielski A, Lichočka M, Dębski J, Ludwików A, Dadlez M, Rodriguez PL, Dobrowolska G (2016) Phosphatase ABI1 and okadaic acid-sensitive phosphoprotein phosphatases inhibit salt stress-activated SnRK2.4 kinase. BMC Plant Biol. doi: 10.1186/s12870-016-0817-1**

Pubmed: [Author and Title](#)

Google Scholar: [Author Only Title Only Author and Title](#)

**Kulik A, Anielska-Mazur A, Bucholc M, Koen E, Szymanska K, Zmienko A, Krzywinska E, Wawer I, McLoughlin F, Ruskowski D, et al (2012) SNF1-related protein kinases type 2 are involved in plant responses to cadmium stress. Plant Physiol 160: 868–883**

Pubmed: [Author and Title](#)

Google Scholar: [Author Only Title Only Author and Title](#)

**Kulik A, Wawer I, Krzywińska E, Bucholc M, Dobrowolska G (2011) SnRK2 Protein Kinases—Key Regulators of Plant Response to Abiotic Stresses. Orni A J Integr Biol 15: 859–872**

Pubmed: [Author and Title](#)

Google Scholar: [Author Only Title Only Author and Title](#)

**Luan S (2009) The CBL-CIPK network in plant calcium signaling. Trends Plant Sci 14: 37–42**

Pubmed: [Author and Title](#)

Google Scholar: [Author Only Title Only Author and Title](#)

**Mach H, Middaugh CR, Lewis R V (1992) Statistical determination of the average values of the extinction coefficients of tryptophan and tyrosine in native proteins. Anal Biochem 200: 74–80**

Pubmed: [Author and Title](#)

Google Scholar: [Author Only Title Only Author and Title](#)

**Maszkowska J, Dębski J, Kulik A, Kistowski M, Bucholc M, Lichočka M, Klimecka M, Sztatelman O, Szymańska KP, Dadlez M, Dobrowolska G (2019) Plant Cell Environ. Mar;42(3):931-946**

Pubmed: [Author and Title](#)

Google Scholar: [Author Only Title Only Author and Title](#)

**McLoughlin F, Galvan-Ampudia CS, Julkowska MM, Caarls L, van der Does D, Laurière C, Munnik T, Haring MA, Testerink C (2012) The Snf1-related protein kinases SnRK2.4 and SnRK2.10 are involved in maintenance of root system architecture during salt stress. Plant J 72: 436–449**

Pubmed: [Author and Title](#)

Google Scholar: [Author Only Title Only Author and Title](#)

**Melotto M, Underwood W, Koczan J, Nomura K, He SY (2006) Plant stomata function in innate immunity against bacterial invasion. Cell 126: 969–980**

Pubmed: [Author and Title](#)

Google Scholar: [Author Only Title Only Author and Title](#)

**Merilo E, Laanemets K, Hu H, Xue S, Jakobson L, Tulva I, Gonzalez-Guzman M, Rodriguez PL, Schroeder JI, Brosche M, et al (2013) PYR/RCAR receptors contribute to ozone-, reduced air humidity-, darkness-, and CO<sub>2</sub>-induced stomatal regulation. Plant Physiol 162: 1652–1668**

Pubmed: [Author and Title](#)

Google Scholar: [Author Only Title Only Author and Title](#)

**Mizoguchi M, Umezawa T, Nakashima K, Kidokoro S, Takasaki H, Fujita Y, Yamaguchi-Shinozaki K, Shinozaki K (2010) Two closely related subclass II SnRK2 protein kinases cooperatively regulate drought-inducible gene. Plant Cell Physiol 51: 842-847**

Pubmed: [Author and Title](#)

Google Scholar: [Author Only Title Only Author and Title](#)

**Mustilli A-C, Merlot S, Vavasseur A, Fenzi F, Giraudat J (2002) Arabidopsis OST1 protein kinase mediates the regulation of stomatal aperture by abscisic acid and acts upstream of reactive oxygen species production. Plant Cell 14: 3089–3099**

Pubmed: [Author and Title](#)

Google Scholar: [Author Only Title Only Author and Title](#)

**Nakamura S1, Mano S, Tanaka Y, Ohnishi M, Nakamori C, Araki M, Niwa T, Nishimura M, Kaminaka H, Nakagawa T, Sato Y, Ishiguro S (2010) Gateway binary vectors with the bialaphos resistance gene, bar, as a selection marker for plant transformation. Biosci Biotechnol Biochem 74:1315-1319-**

Pubmed: [Author and Title](#)

Google Scholar: [Author Only Title Only Author and Title](#)

**Nakashima K, Yamaguchi-Shinozaki K (2013) ABA signaling in stress-response and seed development. Plant Cell Rep 32: 959–970**

Pubmed: [Author and Title](#)

Google Scholar: [Author Only Title Only Author and Title](#)

**Nakashima K, Fujita Y, Kanamori N, Katagiri T, Umezawa T, Kidokoro S, Maruyama K, Yoshida T, Ishiyama K, Kobayashi M, et al (2009) Three Arabidopsis SnRK2 protein kinases, SRK2D/SnRK2.2, SRK2E/SnRK2.6/OST1 and SRK2I/SnRK2.3, involved in ABA signaling are essential for the control of seed development and dormancy. Plant Cell Physiol 50: 1345–1363**

Pubmed: [Author and Title](#)

Google Scholar: [Author Only Title Only Author and Title](#)

**Nelson MR, Chazin WJ (1998) Structures of EF-hand Ca<sup>2+</sup>-binding proteins: Diversity in the organization, packing and response to Ca<sup>2+</sup> binding. BioMetals 11: 297–318**

Pubmed: [Author and Title](#)

Google Scholar: [Author Only Title Only Author and Title](#)

**Ng LM, Melcher K, Teh BT, Xu HE (2014) Abscisic acid perception and signaling: structural mechanisms and applications. Acta Pharmacol Sin 35: 567–584**

Pubmed: [Author and Title](#)

Google Scholar: [Author Only Title Only Author and Title](#)

**Reddy VS, Reddy ASN (2004) Proteomics of calcium-signaling components in plants. Phytochemistry 65: 1745–1776**

Pubmed: [Author and Title](#)

Google Scholar: [Author Only Title Only Author and Title](#)

**Rubio S, Rodrigues A, Saez A, Dizon MB, Galle A, Kim TH, Santiago J, Flexas J, Schroeder JI, Rodriguez PL (2009) Triple loss of function of protein phosphatases type 2C leads to partial constitutive response to endogenous abscisic acid. Plant Physiol 150:1345-1355**



Pubmed: [Author and Title](#)

Google Scholar: [Author Only Title Only Author and Title](#)

**Sanchez-Barrena MJ, Martinez-Ripoll M, Albert A (2013) Structural Biology of a Major Signaling Network that Regulates Plant Abiotic Stress: The CBL-CIPK Mediated Pathway. Int J Mol Sci 14: 5734–5749**

Pubmed: [Author and Title](#)

Google Scholar: [Author Only Title Only Author and Title](#)

**Schulz P1, Herde M, Romeis T (2013) Calcium-dependent protein kinases: hubs in plant stress signaling and development. Plant Physiol 163: 523-530**

Pubmed: [Author and Title](#)

Google Scholar: [Author Only Title Only Author and Title](#)

**Shinozawa A, Otake R, Takezawa D, Umezawa T, Komatsu K, Tanaka K, Amagai A, Ishikawa S, Hara Y, Kamisugi Y, Cuming AC, Hori K, Ohta H, Takahashi F, Shinozaki K, Hayashi T, Taji T, Sakata Y (2019) SnRK2 protein kinases represent an ancient system in plants for adaptation to a terrestrial environment. Nature Commun Biol. 2:30. doi: 10.1038/s42003-019-0281-1. eCollection**

Pubmed: [Author and Title](#)

Google Scholar: [Author Only Title Only Author and Title](#)

**Sirichandra C, Gu D, Hu HC, Davanture M, Lee S, Djaoui M, Valot B, Zvy M, Leung J, Merlot S, Kwak JM (2009) Phosphorylation of the Arabidopsis AtrbohF NADPH oxidase by OST1 protein kinase. FEBS Lett 583: 2982-2986**

Pubmed: [Author and Title](#)

Google Scholar: [Author Only Title Only Author and Title](#)

**Sitkiewicz E, Tarnowski K, Poznanski J, Kulma M, Dadlez M (2013) Oligomerization interface of RAGE receptor revealed by MS-monitored hydrogen deuterium exchange. PLoS One 8: e76353**

Pubmed: [Author and Title](#)

Google Scholar: [Author Only Title Only Author and Title](#)

**Soma F, Mogami J, Yoshida T, Abekura M, Takahashi F, Kidokoro S, Mizoi J, Shinozaki K, Yamaguchi-Shinozaki K (2017) ABA-unresponsive SnRK2 protein kinases regulate mRNA decay under osmotic stress in plants. Nat Plants 3: 16204**

Pubmed: [Author and Title](#)

Google Scholar: [Author Only Title Only Author and Title](#)

**Soon F-F, Ng L-M, Zhou XE, West GM, Kovach A, Tan MHE, Suino-Powell KM, He Y, Xu Y, Chalmers MJ, et al (2012) Molecular Mimicry Regulates ABA Signaling by SnRK2 Kinases and PP2C Phosphatases. Science 335: 85–88**

Pubmed: [Author and Title](#)

Google Scholar: [Author Only Title Only Author and Title](#)

**Tanaka T, Koyanagi KO, Itoh T (2009) Highly diversified molecular evolution of downstream transcription start sites in rice and Arabidopsis. Plant Physiol 149: 1316-1324**

Pubmed: [Author and Title](#)

Google Scholar: [Author Only Title Only Author and Title](#)

**Tzfira T, Tian GW, Lacroix B, Vyas S, Li J, Leitner-Dagan Y, Krichevsky A, Taylor T, Vainstein A, Citovsky V (2005) pSAT vectors: a modular series of plasmids for autofluorescent protein tagging and expression of multiple genes in plants. Plant Mol Biol 57: 503-516**

Pubmed: [Author and Title](#)

Google Scholar: [Author Only Title Only Author and Title](#)

**Umezawa T, Yoshida R, Maruyama K, Yamaguchi-Shinozaki K, Shinozaki K (2004) SRK2C, a SNF1-related protein kinase 2, improves drought tolerance by controlling stress-responsive gene expression in Arabidopsis thaliana. Proc Natl Acad Sci U S A 101:17306-17311**

Pubmed: [Author and Title](#)

Google Scholar: [Author Only Title Only Author and Title](#)

**Umezawa T, Sugiyama N, Mizoguchi M, Hayashi S, Myouga F, Yamaguchi-Shinozaki K, Ishihama Y, Hirayama T, Shinozaki K (2009) Type 2C protein phosphatases directly regulate abscisic acid-activated protein kinases in Arabidopsis. Proc Natl Acad Sci U S A 106: 17588–17593**

Pubmed: [Author and Title](#)

Google Scholar: [Author Only Title Only Author and Title](#)

**Umezawa T, Nakashima K, Miyakawa T, Kuromori T, Tanokura M, Shinozaki K, Yamaguchi-Shinozaki K (2010) Molecular basis of the core regulatory network in ABA responses: sensing, signaling and transport. Plant Cell Physiol 51:1821-1839**

Pubmed: [Author and Title](#)

Google Scholar: [Author Only Title Only Author and Title](#)

**Vlad F, Rubio S, Rodrigues A, Sirichandra C, Belin C, Robert N, Leung J, Rodriguez PL, Laurière C, Merlot S (2009) Protein Phosphatases 2C Regulate the Activation of the Snf1-Related Kinase OST1 by Abscisic Acid in Arabidopsis. Plant Cell 21: 3170–3184**

Pubmed: [Author and Title](#)

Google Scholar: [Author Only Title Only Author and Title](#)

**Wang P, Zhu JK (2016) Assessing Kinase Activity in Plants with In-Gel Kinase Assays. Methods Mol Biol 1363: 189-197**

Pubmed: [Author and Title](#)

Google Scholar: [Author Only Title Only Author and Title](#)

**Yamada H, Koizumi N, Nakamichi N, Kiba T, Yamashino T, Mizuno T (2004) Rapid response of Arabidopsis T87 cultured cells to**

**cytokinin through His-to-Asp phosphorelay signal transduction. Biosci Biotechnol Biochem 68: 1966–1976**

Pubmed: [Author and Title](#)

Google Scholar: [Author Only](#) [Title Only](#) [Author and Title](#)

**Yoshida R, Hobo T, Ichimura K, Mizoguchi T, Takahashi F, Aronso J, Ecker JR, Shinozaki K (2002) ABA-activated SnRK2 protein kinase is required for dehydration stress signaling in Arabidopsis. Plant Cell Physiol 43: 1473–1483**

Pubmed: [Author and Title](#)

Google Scholar: [Author Only](#) [Title Only](#) [Author and Title](#)

**Yoshida T, Mogami J, Yamaguchi-Shinozaki K (2015) Omics Approaches Toward Defining the Comprehensive Abscisic Acid Signaling Network in Plants. Plant Cell Physiol 56:1043-1052.**

Pubmed: [Author and Title](#)

Google Scholar: [Author Only](#) [Title Only](#) [Author and Title](#)

**Zhang X, Henriques R, Lin SS, Niu QW, Chua NH (2006) Agrobacterium-mediated transformation of Arabidopsis thaliana using the floral dip method. Nat Protoc 1(2): 641-646**

Pubmed: [Author and Title](#)

Google Scholar: [Author Only](#) [Title Only](#) [Author and Title](#)

**Zhou XE, Soon F-F, Ng L-M, Kovach A, Suino-Powell KM, Li J, Yong E-L, Zhu J-K, Xu HE, Melcher K (2012) Catalytic mechanism and kinase interactions of ABA-signaling PP2C phosphatases. Plant Signal Behav 7: 581–588**

Pubmed: [Author and Title](#)

Google Scholar: [Author Only](#) [Title Only](#) [Author and Title](#)
